# Supplementary material for: The effects of inhaled corticosteroids on healthy airways
Source: PubMed Central journal article supplement (PMC7616167; doi:10.1111/all.16146), 2024-04-30
Supplement: EMS194910-supplement-Online_supplement.pdf [file EMS194910-supplement-Online_supplement.pdf]

## ONLINE SUPPLEMENT

### The effects of inhaled corticosteroids on healthy airways

<sup>1</sup>Emanuele Marchi, PhD\*, <sup>1</sup>Timothy S.C. Hinks, FRCP, PhD\*, <sup>2</sup>Matthew Richardson, PhD, <sup>2</sup>Latifa Khalfaoui<sup>§</sup>, PhD, <sup>2</sup>Fiona A. Symon PhD, <sup>3</sup>Poojitha Rajasekar, BSc, <sup>3</sup>Rachel Clifford, PhD, <sup>2</sup>Beverley Hargadon RGN, <sup>4</sup>Cary D. Austin MD, PhD, <sup>5</sup>Julia L. MacIsaac, PhD, <sup>5</sup>Michael S. Kobor, PhD, <sup>2</sup>Salman Siddiqui<sup>§</sup>, FRCP, <sup>4</sup>Jordan S. Mar, PhD, <sup>4</sup>Joseph R. Arron MD, PhD, <sup>4</sup>David F. Choy BSc, <sup>2</sup>Peter Bradding FRCP, DM.

<sup>1</sup>NIHR Oxford Respiratory BRC and Respiratory Medicine Unit, Experimental Medicine, Nuffield Department of Medicine, John Radcliffe Hospital, Oxford, UK.

<sup>2</sup>Department of Respiratory Sciences, University of Leicester, Leicester Respiratory NIHR BRC, Glenfield Hospital, Leicester, UK.

<sup>3</sup>Centre for Respiratory Research, Translational Medical Sciences, School of Medicine; Nottingham NIHR Biomedical Research Centre; and Biodiscovery Institute, University Park, University of Nottingham, Nottingham, UK.

<sup>4</sup>Genentech, Inc. South San Francisco, CA, USA.

<sup>5</sup>Edwin S.H. Leong Centre for Healthy Aging, Department of Medical Genetics, University of British Columbia, Vancouver, Canada.

\*These authors contributed equally to this manuscript.

#### Corresponding author

Professor Peter Bradding, Department of Respiratory Sciences, University of Leicester, Glenfield Hospital, Leicester, LE3 9QP, UK. Tel: +44 116 258 3998

E-mail: [pb46@le.ac.uk](mailto:pb46@le.ac.uk)

**Running title:** The effects of ICS on healthy airways

## **METHODS**

This prospective study was approved by the East Midlands - Leicester Central Research Ethics Committee (REC)(reference 15/EM/0313) and registered at [clinicaltrials.gov](https://clinicaltrials.gov) (NCT02476825). All participants gave written informed consent.

### **Participant population**

People aged 18-65 were eligible, and all were current non-smokers with a <10 pack year smoking history. They had no prior history or clinical evidence of lower respiratory disease, and normal spirometry. Healthy volunteers with a history of rhinitis (perennial or seasonal) were required to have a PC<sub>20</sub> methacholine >16 mg/ml. Atopy was defined as a positive skin prick test to common aeroallergens.

### **Participant characterisation**

Participants underwent extensive evaluation at baseline including a full medical history, lung function testing, with bronchial challenge using methacholine where appropriate.

### **Study design**

This was a randomised, open-labelled, bronchoscopy study designed to assess the effects of fluticasone propionate on airway gene expression and cellularity in healthy adult healthy volunteers without asthma. The primary endpoint was the corticosteroid-inducible gene expression pattern in healthy airways. Secondary endpoints were the relative changes from baseline in airway cellularity, DNA methylation and the microbiome following 4-weeks of inhaled fluticasone propionate treatment.

Target recruitment was 30 healthy adult subjects randomised by a blinded investigator (MR) in a 2:1 ratio to one of two study groups: i) subjects receiving fluticasone propionate 500 mcg b.i.d. via Accuhaler (Diskus) for 4 weeks (n=20), or ii) subjects who received no treatment for 4 weeks (n=10). Bronchoscopy was performed in all subjects at baseline prior to the start of the treatment period, and

at the end of week 4. Genentech and Leicester laboratory support staff were blinded to treatment allocation. A control arm was included to provide a comparator for the treatment group and to assess the repeatability of the planned analyses.

To ensure there were sufficient data for analysis, if a subject withdrew before completion of the study, a further subject(s) was randomised after the first 30 randomisations until a total of 30 subjects had completed the study.

### **Bronchoscopy**

Subjects underwent bronchoscopy conducted according to British Thoracic Society guidelines (E1). Mucosal biopsies and brushes were collected from 2<sup>nd</sup>-5<sup>th</sup> generation bronchi under direct vision as per study procedure manual.

### **Tissue processing and immunohistochemistry**

Biopsies were fixed in 4% neutral buffered formalin for 4 hours at 4°C as described (E2), then processed into paraffin wax, as per study procedure manual. Immunohistochemistry was performed in Leicester. All the laboratory procedures and processes were performed following the ISO9001-2015 Quality Management System and GCP/GLP guidelines.

3 µm tissue sections were cut and dewaxed, and stained with haematoxylin and eosin for quality control assessment, to ensure the integrity of the key tissue elements needed for immunohistochemistry staining and analysis. Further 3 µm sections were immunostained with the following mouse monoclonal primary antibodies: anti-neutrophil elastase (clone NP57, 0.42 µg/mL, Agilent Dako, UK), anti-mast cell tryptase clone AA1 (ready-to-use [RTU], Agilent Dako), anti-mast cell chymase (LS-B12242, 0.8 µg/mL, LSBio, UK), anti-eosinophil major basic protein (clone BMK13, 1 µg/mL, Monosan, UK), anti- $\alpha$ -smooth muscle actin ( $\alpha$ SMA)(RTU, Dako) and appropriate isotype controls (Dako and BD Biosciences). All immunostaining steps were performed using an Autostainer Link 48 (Agilent Dako, UK) using appropriate isotype controls followed by counterstaining in Gill's haematoxylin. Two sections from 2 biopsies were stained for each parameter.

## **Assessment of immunopathology**

High-throughput morphologic analysis was performed on scanned sections using the Carl Zeiss Scanner Z1 and AxioCam HRc digital camera (Carl Zeiss, Germany). ZEN desk 3.1 image analysis software was used to perform image analysis on total, ASM, epithelium and lamina propria areas. The following previously validated pathological features (E3) were evaluated as follows; i) nucleated inflammatory cells (eosinophils, neutrophils, mast cells [tryptase+ and chymase+]) were counted in the airway epithelium and lamina propria, and expressed as cells/mm<sup>2</sup> of the compartment of interest; ii) the percentage of biopsy area occupied by airway smooth muscle was measured and expressed as a percentage of the total biopsy area; iii) reticular basement membrane (RBM) thickness was expressed as the mean value of 50-point measurements approximately 20 µm apart according to the method validated by Sullivan *et al* (E4). The mean of two sections from 2 biopsies was taken for each analysis.

All pathological data were assessed by an observer blinded to the identity and treatment allocations of the participants.

## **RNA sequencing**

Bronchial brushes and biopsies were collected in RNAlater as per study procedure manual. Total RNA and DNA separately were isolated from the bronchial brushes and biopsies using QIAgen AllPrep DNA/RNA/miRNA Universal Mini Kit per manufacturer's instructions. Ribosomal RNA was removed using the RiboZero Magnetic Gold kit. RNA sequencing libraries were prepared using the Illumina TruSeq Stranded Total RNA method. Libraries were single-end sequenced. The RNA Sequencing data have been deposited in the Gene Expression Omnibus (GEO) under accession number GSE242048.

## **Cell deconvolution analysis**

Cell deconvolution analysis was performed using MuSiC. Reference cell signatures were derived from single cell data from the Lung Cell Atlas (E5) and annotated with Azimuth in R to assess

predicted changes in cell numbers. Additional gene set enrichment analysis was performed using cell signatures referenced from Travaglini (E6) between day 0 and week 4 of ICS therapy.

To determine whether ICS have differential effects on specific epithelial cell types we used the proportions of 5 different epithelial and structural cell types (multiciliated, basal resting, peribronchial fibroblasts, club and suprabasal), estimated using MuSiC deconvolution, to estimate differential gene expression between treatment conditions according to cell type, using TOAST (E7) in R. Results are presented in **Supplementary table E9**.

### **Bisulphite conversion and DNA methylation arrays**

Seven hundred fifty ng of purified genomic DNA was bisulfite converted using the EZ DNA Methylation Kit (Zymo Research) as per the manufacturer's instructions. Specific incubation conditions for the Illumina Infinium Methylation Assay were used as per the manufacturer's protocol Appendix. Samples were eluted in 12 µl of the provided elution buffer. Bisulfite-converted DNA was assessed for concentration and quality using a NanoDrop™ 8000 Spectrophotometer (Thermo Fisher Scientific), and 160 ng of the conversion product was used for genome-wide DNA methylation quantification at over 850,000 CpG sites using the Illumina Infinium HumanMethylationEPIC BeadChip array, according to the manufacturer's protocols.

### **DNA methylation data quality control and normalization**

Raw data were obtained from GenomeStudio software in IDAT format. The data were analysed using R statistical software (version 4.1.0). Pre-processing and quality control were performed using *minfi* package (version 1.38.0) (E8). The 65 known quality control SNP probes were used to cluster all samples to detect anomalies within samples from the same donor. Probes were excluded from further analysis according to several criteria: first, the 65 SNP probes, second, 84,953 probes represented by less than three beads in at least 5% of samples; third, 1,721 probes that did not pass detection p value threshold ( $p < 0.05$ ) in at least 1% of the samples; fourth, 17,323 probes located on X and Y chromosomes; and finally 26,641 probes that overlap single nucleotide polymorphism and 35979

probes that cross-hybridise to multiple regions on the genome (E9). 699,474 probes remained for analysis. Functional normalisation of filtered probes was carried out using *preprocessFunnorm* function in *minfi* package. Batch effect correction was performed on normalised data to correct for chip and sample position bias using *comBat* function in *sva* package (version 3.40.0)(E10). Two values of DNA methylation were calculated, beta-values ( $\beta$ -values) and *M*-values.  $\beta$ -values are the ratio of all methylated probe intensities over total signal intensities (methylated and unmethylated) and have a range from 0 to 1. They approximately represent percent methylation. *M*-values are the logit transformation of  $\beta$ -values and are more statistically robust(E11). All statistical analyses were performed using *M*-values, while  $\beta$ -values were used for visualization and interpretability purposes.

### **Differential DNA methylation analysis**

Linear regression analysis was applied to the data using the *limma* package (version 3.48.0) in R(E12). An interaction term and subject correlation were included to identify any probes differentially methylated between baseline and week 4 in individuals taking fluticasone independently to the control untreated individuals (Methylation~Timepoint + Treatment + TimepointxTreatment + [1 | Subject ID]).

### **Expression quantitative trait methylation (eQTM) analysis**

Association of DNA methylation with differential expression was studied using expression quantitative trait methylation analysis. Twenty nine differentially expressed genes and comprehensive DNA methylation data (699474 probes resulting after probe filtering) from week 0 and week 4 fluticasone treatment samples were given as input into an eQTM linear regression model to identify significantly correlating expression-methylation pairs. Significant pairs were classified based on a Benjamini-Hochberg false discovery rate (FDR) less than 0.05.

### **Microbiota Sequence Data Generation, Processing, and Analysis**

DNA isolated from bronchial brushes was sent to Diversigen for bacterial 16SV4 rRNA gene sequencing as previously described (E13,14). Briefly, PCR amplification of the 16S rRNA gene was

conducted for each sample using barcoded primers targeting the 16S-V4 region. Following PCR, amplicon libraries were pooled at equimolar concentrations and purified. Pooled amplicon sequence libraries were then sequenced with a MiSeq 600 cycle v3 kit (Illumina, San Diego, CA). Following sequencing, QIIME2 v2019.7 was used to process the 16S-V4 rRNA gene sequence data as previously described (E15,16). Briefly, raw sequence data was demultiplexed, read trimming was performed to remove regions of low sequence quality, and paired-end reads were denoised, dereplicated, and chimera filtered with DADA2(E17). The remaining non-chimeric reads were then filtered to remove reads mapping to the human genome using bowtie2 (E18). Taxonomy was assigned based on the V4 region of the Genome Taxonomy Database 16S rRNA gene sequence database (r202) (E19). Resulting abundance tables were rarefied to 8900 reads per sample to account for variable sequencing depth prior to calculation of  $\alpha$ - and  $\beta$ -diversity metrics and samples with less than 8900 high quality reads were discarded. All statistical analyses were conducted in the R statistical environment as previously described (Team RC. R: A Language and Environment for Statistical Computing. Vienna, Austria; 2020) (E20). All microbiome sequence data is available from the European Genome-Phenome Archive (<https://ega-archive.org/>, EGAS00001007538).

### **Transcriptomic analysis**

For analysis of RNA-seq data, sequences in fastq files (in single and pair ends) were aligned using STAR aligner (version 2.7.1a) to the human reference genome GRCh38; R package (E21)*Rsubread* was employed for quantification of reads assigned to genes.

Raw count pre-processing, normalisation and differential gene expression analysis was performed using R, packaged edgeR (for pre-processing and gene expression filtering) and gene expression analysis with *DESeq2*, and *limma*. Gene lists of differentially expressed genes and over-representation analysis of gene pathways/categories were produced from *DESeq2* and *limma* results; volcano plots were generated with log<sub>2</sub> fold changes and adjusted p values resulting from moderated t tests in *limma*.(E21,22).

## **Statistical analysis**

Basic summary statistical analysis was performed using GraphPad Prism version 7.03 (GraphPad Software, San Diego). Parametric and non-parametric data are presented as mean (standard error mean [SEM]) and median (interquartile range [IQR]) respectively unless otherwise stated.



## SUPPLEMENTARY RESULTS

### Comparison with corticosteroid-treated structural cells from published *in vitro* transcriptomic datasets

To compare the effects of corticosteroid treatment on specific structural cells we checked for variations in gene expression reanalysing publicly available data obtained from fibroblast cell lines, primary smooth muscle cells and primary respiratory epithelium treated *in vitro* with corticosteroids. Leung *et al* (E23) analysed the effect of cortisol on the IMR-90 human lung fibroblast cell line. We found no enrichment of this steroid-induced fibroblast geneset, using GSEA on genes stringently up regulated between cortisol and vehicle control, at log fold change > 3 and adjusted  $p < 0.05$  when assessing our genes from our dataset differentially expressed between day 0 and week 4 (**Supplementary Figure E12, panel A**).

By contrast we observed very strong enrichment of a geneset derived from primary human airway smooth muscle cells treated with fluticasone propionate, from Jackson *et al* (E24). In this study primary airway smooth muscle cells were dissected from trachea and lung tissue from paediatric patients and treated *ex vivo* with fluticasone propionate (FP). This geneset was highly enriched, normalised enrichment score (NES) 2.7, adjusted  $P < 1 \times 10^{-11}$ . (**Supplementary Figure E12, panel B**).

Likewise we observed very strong enrichment of a geneset derived from primary human airway epithelial cells treated *in vitro* with budesonide, from Ginebaugh *et al* (E25). This geneset was highly enriched, normalised enrichment score (NES) 2.5, adjusted  $P < 1 \times 10^{-11}$ . (**Supplementary Figure E12, panel C**).

### Effects of ICS on the airway microbiome

To assess the potential impact of ICS treatment on the bacterial community composition of the lower airways, bronchial brushing DNA from paired baseline and week 4 samples from treated and untreated individuals was subjected to 16SV4 rRNA gene sequencing (16SV4-seq). Processing

resulted in high quality 16SV4-seq data from paired baseline/week 4 samples from 6 untreated and 12 ICS-treated individuals. Between baseline and week 4, no difference in  $\alpha$ -diversity was observed, regardless of treatment group. Additionally, no difference in gross bacterial community composition based on  $\beta$ -diversity was observed when comparing baseline and week 4 samples between treated and untreated participants. At the individual taxa level, the relative abundance of only two species was significantly changed (Benjamini-Hochberg adjusted p-value < 0.05) following ICS treatment. Relative abundance of *Alloprevotella tannerae* was significantly increased at week 4 in ICS-treated individuals compared to baseline while that of an unclassified *Corynebacterium* member was decreased (**Supplementary Figure E13**).

### **Effects of ICS on airway DNA methylation**

Linear regression analysis identified only a single significantly differentially methylated CpG site, cg14383238 (Benjamini Hochberg p=0.013) (**Supplementary Figure E14**), suggesting global airway epithelial cell DNA methylation is minimally affected by short term fluticasone treatment. cg14383238 lies on north shore of a CpG island located in the promoter associated transcription start site of transmembrane protein 63C (TMEM63C) located on chromosome 14. This gene is associated with Ca<sup>2+</sup>-activated cation channel activity required for kidney glomerular filtration barrier function. Having identified 29 differentially expressed genes in response to four weeks inhaled corticosteroid treatment in bronchial epithelial cells, we sought to investigate the involvement of DNA methylation in regulating these changes. Expression quantitative trait methylation (eQTM) analysis was performed using differentially expressed genes and 699474 CpG sites in matched samples of bronchial brushing derived epithelial cells. There were 48978 significant gene-CpG correlations (Benjamini Hochberg p<0.05) that comprised 29 differentially expressed genes and 30389 CpG sites. Despite the correlation, there was no significant difference relative to baseline in the expression-associated CpG sites following 4 weeks of fluticasone treatment.

## SUPPLEMENTARY REFERENCES

- E1. Du Rand IA, Blaikley J, Booton R, et al. British Thoracic Society guideline for diagnostic flexible bronchoscopy in adults: accredited by NICE. *Thorax* 2013; 68 Suppl 1: i1-i44.
- E2. Austin CD, Gonzalez Edick M, Ferrando RE, et al. A randomized, placebo-controlled trial evaluating effects of lebrikizumab on airway eosinophilic inflammation and remodelling in uncontrolled asthma (CLAVIER). *Clin Exp Allergy* 2020; 50: 1342-1351.
- E3. Siddiqui S, Shikotra A, Richardson M, et al. Airway pathological heterogeneity in asthma: Visualization of disease microclusters using topological data analysis. *J Allergy Clin Immunol* 2018; 142: 1457-1468.
- E4. Sullivan P, Stephens D, Ansari T, Costello J, Jeffery P. Variation in the measurements of basement membrane thickness and inflammatory cell number in bronchial biopsies. *Eur Respir J* 1998; 12: 811-815.
- E5. Vieira Braga FA, Kar G, Berg M, et al. A cellular census of human lungs identifies novel cell states in health and in asthma. *Nat Med* 2019; 25: 1153-1163.
- E6. Travaglini KJ, Nabhan AN, Penland L, et al. A molecular cell atlas of the human lung from single-cell RNA sequencing. *Nature* 2020; 587: 619-625.
- E7. Li Z, Wu H. TOAST: improving reference-free cell composition estimation by cross-cell type differential analysis. *Genome Biol* 2019; 20: 190.
- E8. Aryee MJ, Jaffe AE, Corrada-Bravo H, et al. Minfi: a flexible and comprehensive Bioconductor package for the analysis of Infinium DNA methylation microarrays. *Bioinformatics* 2014; 30: 1363-1369.
- E9. Pidsley R, Zotenko E, Peters TJ, et al. Critical evaluation of the Illumina MethylationEPIC BeadChip microarray for whole-genome DNA methylation profiling. *Genome Biol* 2016; 17: 208.
- E10. Leek JT, Johnson WE, Parker HS, Jaffe AE, Storey JD. The sva package for removing batch effects and other unwanted variation in high-throughput experiments. *Bioinformatics* 2012; 28: 882-883.
- E11. Du P, Zhang X, Huang CC, et al. Comparison of Beta-value and M-value methods for quantifying methylation levels by microarray analysis. *BMC bioinformatics* 2010; 11: 587.
- E12. Ritchie ME, Phipson B, Wu D, et al. limma powers differential expression analyses for RNA-sequencing and microarray studies. *Nucleic Acids Res* 2015; 43: e47.
- E13. Gohl DM, Vangay P, Garbe J, et al. Systematic improvement of amplicon marker gene methods for increased accuracy in microbiome studies. *Nat Biotechnol* 2016; 34: 942-949.
- E14. Caporaso JG, Lauber CL, Walters WA, et al. Ultra-high-throughput microbial community analysis on the Illumina HiSeq and MiSeq platforms. *The ISME journal* 2012; 6: 1621-1624.
- E15. Wagner F, Mansfield JC, Lekkerkerker AN, et al. Dose escalation randomised study of efmarodocokin alfa in healthy volunteers and patients with ulcerative colitis. *Gut* 2023.
- E16. Bolyen E, Rideout JR, Dillon MR, et al. Reproducible, interactive, scalable and extensible microbiome data science using QIIME 2. *Nat Biotechnol* 2019; 37: 852-857.
- E17. Callahan BJ, McMurdie PJ, Rosen MJ, Han AW, Johnson AJ, Holmes SP. DADA2: High-resolution sample inference from Illumina amplicon data. *Nat Methods* 2016; 13: 581-583.
- E18. Langmead B, Salzberg SL. Fast gapped-read alignment with Bowtie 2. *Nat Methods* 2012; 9: 357-359.
- E19. Parks DH, Chuvochina M, Chaumeil PA, Rinke C, Mussig AJ, Hugenholtz P. A complete domain-to-species taxonomy for Bacteria and Archaea. *Nat Biotechnol* 2020; 38: 1079-1086.
- E20. Mar JS, Ota N, Pokorzynski ND, et al. IL-22 alters gut microbiota composition and function to increase aryl hydrocarbon receptor activity in mice and humans. *Microbiome* 2023; 11: 47.
- E21. Foundation TR. The R Project for Statistical Computing. [cited 2023 23/05/2023]. Available from: <http://www.r-project.org/index.html>.
- E22. Reimers M, Carey VJ. Bioconductor: an open source framework for bioinformatics and computational biology. *Methods Enzymol* 2006; 411: 119-134.
- E23. Leung CS, Kosyk O, Welter EM, Dietrich N, Archer TK, Zannas AS. Chronic stress-driven glucocorticoid receptor activation programs key cell phenotypes and functional epigenomic patterns in human fibroblasts. *iScience* 2022; 25: 104960.
- E24. Jackson D, Walum J, Banerjee P, et al. Th1 cytokines synergize to change gene expression and promote corticosteroid insensitivity in pediatric airway smooth muscle. *Respir Res* 2022; 23: 126.

- E25. Ginebaugh SP, Hagner M, Ray A, et al. Bronchial epithelial cell transcriptional responses to inhaled corticosteroids dictate severe asthmatic outcomes. *J Allergy Clin Immunol* 2023; 151: 1513-1524.
- E26. Woodruff PG, Boushey HA, Dolganov GM, et al. Genome-wide profiling identifies epithelial cell genes associated with asthma and with treatment response to corticosteroids. *Proc Natl Acad Sci U S A* 2007; 104: 15858-15863.

**Supplementary Table E1.** All upregulated differentially expressed genes in bronchial brushes after 4 weeks of inhaled fluticasone (treatment group only). Log2 fold changes and statistical tests calculated using Wald tests in *DESeq2*. Genes shown are censored at FDR  $P < 0.05$  and log(2) fold change of  $\pm 1$  and ordered by P value. FDR, false discovery rate.

**Genes upregulated in bronchial brushes**

| <b>Gene</b> | <b>Baseline<br/>read count</b> | <b>Log2<br/>fold<br/>change</b> | <b>t</b> | <b>P value</b> | <b>FDR P<br/>value</b> |
|-------------|--------------------------------|---------------------------------|----------|----------------|------------------------|
| PHACTR3     | 497                            | 3.59                            | 14.22    | 7.3E-46        | 1E-41                  |
| HSD11B2     | 468                            | 1.89                            | 14.11    | 3.3E-45        | 3E-41                  |
| MYLK3       | 476                            | 1.10                            | 13.99    | 1.8E-44        | 1E-40                  |
| FKBP5       | 3336                           | 1.88                            | 11.56    | 6.7E-31        | 2E-27                  |
| BTNL9       | 369                            | 1.71                            | 11.52    | 1.1E-30        | 3E-27                  |
| GRAMD2A     | 2452                           | 1.15                            | 10.81    | 3E-27          | 5E-24                  |
| IFITM10     | 1872                           | 1.55                            | 10.36    | 3.9E-25        | 4E-22                  |
| FAM107A     | 3486                           | 1.45                            | 10.32    | 6E-25          | 6E-22                  |
| HCAR2       | 4673                           | 1.10                            | 9.81     | 1E-22          | 9E-20                  |
| TSC22D3     | 7099                           | 1.12                            | 9.28     | 1.7E-20        | 1E-17                  |
| SLCO1B3     | 124                            | 1.94                            | 9.24     | 2.5E-20        | 2E-17                  |
| SULT2B1     | 1706                           | 1.38                            | 9.17     | 4.7E-20        | 3E-17                  |
| HIF3A       | 584                            | 3.18                            | 9.13     | 7E-20          | 4E-17                  |

|             |       |      |      |         |       |
|-------------|-------|------|------|---------|-------|
| ADAMTS9     | 204   | 1.38 | 9.08 | 1.1E-19 | 6E-17 |
| CYP17A1-AS1 | 115   | 1.83 | 9.04 | 1.5E-19 | 9E-17 |
| ITGA10      | 160   | 1.41 | 8.73 | 2.5E-18 | 1E-15 |
| GP2         | 341   | 2.48 | 8.74 | 2.4E-18 | 1E-15 |
| KCNB1       | 602   | 1.03 | 8.68 | 3.8E-18 | 2E-15 |
| SYT8        | 503   | 1.12 | 8.62 | 6.6E-18 | 3E-15 |
| CD163       | 1860  | 2.45 | 8.51 | 1.8E-17 | 7E-15 |
| ANPEP       | 2159  | 1.16 | 8.29 | 1.1E-16 | 4E-14 |
| PRODH       | 5268  | 1.20 | 8.26 | 1.5E-16 | 6E-14 |
| PSCA        | 23905 | 1.21 | 8.19 | 2.6E-16 | 9E-14 |
| TFCP2L1     | 3228  | 1.38 | 8.06 | 7.9E-16 | 3E-13 |
| GAS6-AS1    | 121   | 1.42 | 7.86 | 4E-15   | 1E-12 |
| GNMT        | 704   | 1.28 | 7.77 | 7.9E-15 | 2E-12 |
| TAT-AS1     | 242   | 1.01 | 7.58 | 3.4E-14 | 8E-12 |
| ANGPT1      | 188   | 1.22 | 7.41 | 1.3E-13 | 3E-11 |
| ABCC3       | 882   | 1.00 | 7.23 | 4.7E-13 | 9E-11 |
| PPP1R16B    | 2159  | 1.11 | 7.11 | 1.2E-12 | 2E-10 |
| KCNMA1      | 369   | 1.12 | 6.99 | 2.8E-12 | 5E-10 |
| GAS1        | 136   | 1.15 | 6.80 | 1E-11   | 1E-09 |
| LPL         | 369   | 2.41 | 6.65 | 2.8E-11 | 4E-09 |
| LINC00930   | 204   | 1.11 | 6.50 | 7.9E-11 | 9E-09 |
| FLVCR2      | 173   | 1.01 | 6.41 | 1.5E-10 | 2E-08 |

|          |      |      |      |         |        |
|----------|------|------|------|---------|--------|
| MUC21    | 134  | 1.51 | 6.28 | 3.5E-10 | 3E-08  |
| HAP1     | 132  | 1.17 | 6.21 | 5.3E-10 | 5E-08  |
| VSIG4    | 808  | 1.79 | 5.98 | 2.3E-09 | 2E-07  |
| MMP7     | 203  | 1.09 | 5.95 | 2.7E-09 | 2E-07  |
| ADAMTSL4 | 232  | 1.07 | 5.80 | 6.5E-09 | 4E-07  |
| CPM      | 202  | 1.30 | 5.73 | 1E-08   | 6E-07  |
| ERVS71-1 | 1059 | 1.51 | 5.72 | 1E-08   | 6E-07  |
| ZBTB16   | 362  | 1.88 | 5.70 | 1.2E-08 | 7E-07  |
| MMP19    | 193  | 2.05 | 5.66 | 1.5E-08 | 8E-07  |
| GDNF-AS1 | 119  | 1.02 | 5.58 | 2.4E-08 | 1E-06  |
| MTUS2    | 198  | 1.03 | 5.31 | 1.1E-07 | 5E-06  |
| MS4A4A   | 231  | 1.19 | 5.14 | 2.7E-07 | 1E-05  |
| CYP4A11  | 175  | 1.34 | 5.10 | 3.4E-07 | 1E-05  |
| GLDN     | 248  | 1.17 | 5.10 | 3.4E-07 | 1E-05  |
| SLC11A1  | 627  | 1.32 | 4.73 | 2.3E-06 | 6E-05  |
| AOC3     | 320  | 1.67 | 4.72 | 2.4E-06 | 6E-05  |
| MME      | 291  | 1.44 | 4.65 | 3.4E-06 | 8E-05  |
| LILRA6   | 117  | 1.08 | 4.08 | 4.4E-05 | 0.0007 |
| TREM1    | 436  | 1.26 | 3.90 | 9.5E-05 | 0.0013 |
| FABP4    | 1683 | 1.49 | 3.86 | 0.00011 | 0.0014 |
| TRNA     | 293  | 1.30 | 3.80 | 0.00015 | 0.0018 |
| IL1R2    | 259  | 1.45 | 3.73 | 0.00019 | 0.0022 |

|          |       |      |      |         |        |
|----------|-------|------|------|---------|--------|
| SERPINA3 | 417   | 1.77 | 3.71 | 0.00021 | 0.0023 |
| KRT6A    | 1428  | 1.25 | 3.48 | 0.00049 | 0.0046 |
| CLEC4E   | 156   | 1.34 | 3.29 | 0.00101 | 0.0081 |
| ELOA3BP  | 160   | 1.01 | 3.28 | 0.00104 | 0.0083 |
| MARCO    | 1414  | 1.26 | 3.28 | 0.00104 | 0.0083 |
| MSR1     | 1008  | 1.06 | 3.18 | 0.00147 | 0.01   |
| TRNE     | 9170  | 1.08 | 3.17 | 0.00151 | 0.01   |
| PCOLCE2  | 105   | 1.04 | 3.12 | 0.00184 | 0.01   |
| MRC1     | 381   | 1.06 | 3.11 | 0.00189 | 0.01   |
| MCEMP1   | 186   | 1.01 | 2.95 | 0.00313 | 0.02   |
| RBP4     | 164   | 1.18 | 2.86 | 0.00426 | 0.02   |
| APOC1    | 1804  | 1.05 | 2.75 | 0.00597 | 0.03   |
| CXCL13   | 101   | 1.86 | 2.64 | 0.00838 | 0.04   |
| APOC1P1  | 124   | 1.16 | 2.63 | 0.00866 | 0.041  |
| SAA1     | 23140 | 1.34 | 2.58 | 0.00992 | 0.045  |



**Supplementary Table E2.** All downregulated differentially expressed genes in bronchial brushes after 4 weeks of inhaled fluticasone (treatment group only). Log2 fold changes and statistical tests calculated using Wald tests in *DESeq2*. Genes shown are censored at FDR  $P < 0.05$  and log(2) fold change of  $\pm 1$  and ordered by P value. FDR, false discovery rate.

**Genes downregulated in bronchial brushes**

| <b>Gene</b>         | <b>Baseline read count</b> | <b>Log2 fold change</b> | <b>t</b> | <b>P value</b> | <b>FDR P value</b> |
|---------------------|----------------------------|-------------------------|----------|----------------|--------------------|
| FCER1A              | 144                        | -2.78                   | -10.91   | 1.019E-27      | 2.15E-24           |
| ZNF683 (Hobit)      | 136                        | -3.33                   | -10.66   | 1.544E-26      | 2.31E-23           |
| CD207<br>(Langerin) | 169                        | -3.78                   | -10.63   | 2.193E-26      | 3.05E-23           |
| IL33                | 3885                       | -1.20                   | -10.43   | 1.792E-25      | 2.18E-22           |
| CLEC4F              | 102                        | -2.18                   | -10.35   | 4.237E-25      | 4.59E-22           |
| CCL5 (RANTES)       | 1133                       | -2.39                   | -8.74    | 2.232E-18      | 1.21E-15           |
| PTGS1               | 129                        | -1.19                   | -8.64    | 5.515E-18      | 2.5E-15            |
| HEPACAM2            | 450                        | -1.00                   | -8.59    | 8.478E-18      | 3.67E-15           |
| TARP                | 100                        | -2.50                   | -8.51    | 1.724E-17      | 7.3E-15            |
| CD96                | 253                        | -1.62                   | -7.85    | 4.091E-15      | 1.31E-12           |
| ABCB11              | 147                        | -1.32                   | -7.52    | 5.653E-14      | 1.33E-11           |
| UCN3                | 239                        | -1.05                   | -7.30    | 2.792E-13      | 5.67E-11           |

|           |      |       |       |           |          |
|-----------|------|-------|-------|-----------|----------|
| TRBC1     | 353  | -2.33 | -7.04 | 1.95E-12  | 3.39E-10 |
| CX3CR1    | 102  | -1.49 | -7.04 | 1.969E-12 | 3.4E-10  |
| TRBC2     | 463  | -2.41 | -6.92 | 4.595E-12 | 7.16E-10 |
| CD3E      | 375  | -1.55 | -6.87 | 6.523E-12 | 9.48E-10 |
| PTPN22    | 165  | -1.26 | -6.80 | 1.017E-11 | 1.43E-09 |
| TRAC      | 539  | -1.92 | -6.67 | 2.559E-11 | 3.37E-09 |
| IGF2BP3   | 140  | -1.29 | -6.66 | 2.77E-11  | 3.6E-09  |
| KLRB1     | 131  | -1.69 | -6.65 | 2.935E-11 | 3.76E-09 |
| TRAF3IP3  | 231  | -1.01 | -6.57 | 5.098E-11 | 6.37E-09 |
| CPA3      | 228  | -2.26 | -6.55 | 5.716E-11 | 7E-09    |
| GIMAP7    | 143  | -1.71 | -6.53 | 6.429E-11 | 7.68E-09 |
| CD2       | 566  | -1.87 | -6.45 | 1.141E-10 | 1.23E-08 |
| CLEC10A   | 135  | -1.71 | -6.38 | 1.776E-10 | 1.82E-08 |
| SERPINB10 | 287  | -1.18 | -6.38 | 1.797E-10 | 1.82E-08 |
| SCML4     | 123  | -1.09 | -6.30 | 2.994E-10 | 2.86E-08 |
| TMC8      | 344  | -1.00 | -6.22 | 4.86E-10  | 4.36E-08 |
| CTSW      | 148  | -1.42 | -6.18 | 6.362E-10 | 5.46E-08 |
| KLRC1     | 127  | -1.34 | -6.12 | 9.415E-10 | 7.84E-08 |
| RASAL3    | 240  | -1.06 | -6.11 | 9.794E-10 | 8.05E-08 |
| MUC13     | 4313 | -1.67 | -6.10 | 1.052E-09 | 8.58E-08 |
| HSPA7     | 253  | -1.30 | -6.06 | 1.334E-09 | 1.05E-07 |
| GIMAP6    | 201  | -1.55 | -6.02 | 1.756E-09 | 1.33E-07 |

|          |     |       |       |           |          |
|----------|-----|-------|-------|-----------|----------|
| LCK      | 324 | -1.15 | -5.99 | 2.16E-09  | 1.57E-07 |
| SPOCK2   | 418 | -1.29 | -5.77 | 7.949E-09 | 4.86E-07 |
| CD8A     | 516 | -1.55 | -5.71 | 1.11E-08  | 6.4E-07  |
| CD8B     | 171 | -1.26 | -5.67 | 1.418E-08 | 7.98E-07 |
| PLG      | 110 | -1.08 | -5.62 | 1.912E-08 | 1.05E-06 |
| ITGA1    | 273 | -1.17 | -5.61 | 2.031E-08 | 1.11E-06 |
| ITK      | 119 | -1.48 | -5.59 | 2.228E-08 | 1.2E-06  |
| ITLN1    | 197 | -1.93 | -5.52 | 3.433E-08 | 1.71E-06 |
| GFI1     | 133 | -1.06 | -5.52 | 3.478E-08 | 1.73E-06 |
| CD247    | 132 | -1.56 | -5.32 | 1.042E-07 | 4.61E-06 |
| CD3D     | 283 | -1.66 | -5.31 | 1.1E-07   | 4.83E-06 |
| RGS7BP   | 172 | -1.06 | -5.25 | 1.505E-07 | 6.32E-06 |
| KLRC2    | 106 | -1.23 | -5.20 | 2.006E-07 | 7.95E-06 |
| HLA-DQB2 | 798 | -1.01 | -5.16 | 2.481E-07 | 9.52E-06 |
| GLYATL2  | 190 | -1.42 | -5.06 | 4.117E-07 | 1.46E-05 |
| IKZF3    | 405 | -1.35 | -5.05 | 4.425E-07 | 1.56E-05 |
| CXCR6    | 396 | -1.65 | -5.03 | 4.95E-07  | 1.72E-05 |
| GIMAP8   | 116 | -1.21 | -5.02 | 5.168E-07 | 1.78E-05 |
| IGKC     | 400 | -2.29 | -4.91 | 8.899E-07 | 2.79E-05 |
| IGHG2    | 175 | -2.35 | -4.72 | 2.315E-06 | 6.23E-05 |
| GVINP1   | 212 | -1.01 | -4.66 | 3.152E-06 | 8E-05    |
| CCR5     | 295 | -1.42 | -4.61 | 4.078E-06 | 9.97E-05 |

|        |      |       |       |           |        |
|--------|------|-------|-------|-----------|--------|
| LTB    | 103  | -1.98 | -4.60 | 4.236E-06 | 0.0001 |
| MGAM   | 455  | -1.40 | -4.60 | 4.249E-06 | 0.0001 |
| TPSAB1 | 442  | -1.65 | -4.60 | 4.31E-06  | 0.0001 |
| TPSB2  | 504  | -1.66 | -4.57 | 4.81E-06  | 0.0001 |
| IGHG3  | 144  | -2.34 | -4.56 | 5.064E-06 | 0.0001 |
| IGHA1  | 502  | -2.01 | -4.44 | 8.875E-06 | 0.0002 |
| MYO7A  | 120  | -1.00 | -4.41 | 1.014E-05 | 0.0002 |
| IGHG1  | 227  | -2.24 | -4.37 | 1.242E-05 | 0.0003 |
| IGLC2  | 269  | -2.33 | -4.35 | 1.335E-05 | 0.0003 |
| ADAM19 | 191  | -2.03 | -4.34 | 1.42E-05  | 0.0003 |
| PTPN7  | 248  | -1.32 | -4.29 | 1.787E-05 | 0.0003 |
| ENPP2  | 115  | -1.09 | -4.05 | 5.074E-05 | 0.0008 |
| GPR18  | 137  | -1.50 | -4.05 | 5.228E-05 | 0.0008 |
| NKG7   | 192  | -1.66 | -3.92 | 8.676E-05 | 0.001  |
| HDAC9  | 510  | -1.20 | -3.73 | 0.0002    | 0.002  |
| GZMH   | 137  | -1.51 | -3.67 | 0.0002    | 0.003  |
| UBD    | 2630 | -1.40 | -3.62 | 0.0003    | 0.003  |
| CD48   | 271  | -1.14 | -3.57 | 0.0004    | 0.004  |
| IGHA2  | 201  | -1.98 | -3.54 | 0.0004    | 0.004  |
| IGLC3  | 216  | -2.28 | -3.49 | 0.0005    | 0.005  |
| MUC2   | 2840 | -1.12 | -3.48 | 0.0005    | 0.005  |
| FGL2   | 781  | -1.10 | -3.38 | 0.0007    | 0.006  |

|         |      |       |       |        |       |
|---------|------|-------|-------|--------|-------|
| CD7     | 187  | -1.23 | -3.36 | 0.0008 | 0.007 |
| CEACAM5 | 3288 | -1.24 | -3.36 | 0.0008 | 0.007 |
| SLC5A8  | 1538 | -1.01 | -3.04 | 0.002  | 0.02  |
| IL32    | 581  | -1.09 | -2.85 | 0.004  | 0.02  |

**Supplementary Table E3.** All upregulated differentially expressed genes in bronchial biopsies after 4 weeks of inhaled fluticasone (treatment group only). Log2 fold changes and statistical tests calculated using Wald tests in *DESeq2*. Genes shown are censored at FDR  $P < 0.05$  and log(2) fold change of  $\pm 1$  and ordered by P value. FDR, false discovery rate.

**Genes upregulated in bronchial biopsies**

| <b>Gene</b> | <b>Baseline<br/>read<br/>count</b> | <b>Log2 fold<br/>change</b> | <b>t</b> | <b>P value</b> | <b>FDR P value</b> |
|-------------|------------------------------------|-----------------------------|----------|----------------|--------------------|
| PHACTR3     | 325                                | 3.28                        | 13.65    | 2.082E-42      | 4.287E-38          |
| HSD11B2     | 392                                | 1.81                        | 13.37    | 9.595E-41      | 9.879E-37          |
| GP2         | 286                                | 3.12                        | 11.67    | 1.906E-31      | 9.81E-28           |
| SYT8        | 470                                | 1.13                        | 10.52    | 6.904E-26      | 2.37E-22           |
| HIF3A       | 990                                | 2.67                        | 10.21    | 1.818E-24      | 5.347E-21          |
| FKBP5       | 5029                               | 1.67                        | 10.00    | 1.526E-23      | 3.142E-20          |
| FAM107A     | 3657                               | 1.60                        | 9.22     | 2.932E-20      | 4.024E-17          |
| MYLK3       | 490                                | 1.47                        | 9.16     | 5.081E-20      | 6.54E-17           |
| TFCP2L1     | 4849                               | 1.40                        | 9.06     | 1.357E-19      | 1.643E-16          |
| SULT2B1     | 1199                               | 1.44                        | 8.73     | 2.441E-18      | 2.011E-15          |
| GRAMD2A     | 2309                               | 1.38                        | 8.70     | 3.398E-18      | 2.691E-15          |
| GMPR        | 694                                | 1.09                        | 8.61     | 7.136E-18      | 4.592E-15          |
| HCAR3       | 1622                               | 1.10                        | 8.40     | 4.361E-17      | 2.566E-14          |

|          |       |      |      |           |           |
|----------|-------|------|------|-----------|-----------|
| PSCA     | 13008 | 1.87 | 8.35 | 7.063E-17 | 3.828E-14 |
| SLCO1B3  | 111   | 2.27 | 8.31 | 9.972E-17 | 5.106E-14 |
| HCAR2    | 3361  | 1.22 | 8.20 | 2.505E-16 | 1.146E-13 |
| ATP6V1C2 | 1007  | 1.24 | 8.03 | 9.549E-16 | 4.013E-13 |
| PRODH    | 4754  | 1.10 | 7.94 | 2.075E-15 | 8.217E-13 |
| TSC22D3  | 8967  | 1.14 | 7.84 | 4.357E-15 | 1.547E-12 |
| PDK4     | 2453  | 1.27 | 7.44 | 1.031E-13 | 2.869E-11 |
| IFITM10  | 1816  | 1.23 | 7.40 | 1.407E-13 | 3.713E-11 |
| ANPEP    | 1707  | 1.02 | 7.31 | 2.592E-13 | 6.28E-11  |
| KCNB1    | 662   | 1.28 | 6.97 | 3.25E-12  | 6.626E-10 |
| ERVS71-1 | 810   | 2.02 | 6.70 | 2.045E-11 | 3.29E-09  |
| NPTX2    | 109   | 1.63 | 6.70 | 2.15E-11  | 3.405E-09 |
| PAQR4    | 943   | 1.02 | 6.59 | 4.3E-11   | 5.982E-09 |
| PKIB     | 2384  | 1.21 | 6.34 | 2.364E-10 | 2.735E-08 |
| GNMT     | 548   | 1.10 | 5.97 | 2.427E-09 | 1.968E-07 |
| TAT-AS1  | 146   | 1.10 | 5.82 | 5.916E-09 | 4.094E-07 |
| AACSP1   | 109   | 1.29 | 5.48 | 4.197E-08 | 2.199E-06 |
| SEC14L5  | 584   | 1.08 | 5.38 | 7.27E-08  | 3.506E-06 |
| GALNT15  | 461   | 2.29 | 4.55 | 5.267E-06 | 0.0001    |
| CLDN8    | 1164  | 1.16 | 4.52 | 6.297E-06 | 0.0002    |
| MTUS2    | 196   | 1.30 | 4.48 | 7.342E-06 | 0.0002    |
| FOXN4    | 222   | 1.03 | 4.47 | 7.923E-06 | 0.0002    |

|           |       |      |      |           |        |
|-----------|-------|------|------|-----------|--------|
| CDC20B    | 903   | 1.15 | 4.45 | 8.653E-06 | 0.0002 |
| LINC00964 | 534   | 1.13 | 4.30 | 1.738E-05 | 0.0004 |
| KLHDC8A   | 405   | 1.21 | 4.25 | 2.108E-05 | 0.0005 |
| MUC21     | 117   | 1.36 | 4.24 | 2.23E-05  | 0.0005 |
| SLC6A1    | 179   | 1.30 | 3.80 | 0.0001423 | 0.0023 |
| ZBTB16    | 759   | 1.11 | 3.79 | 0.0001514 | 0.002  |
| SERPINA3  | 1487  | 1.41 | 3.68 | 0.0002316 | 0.003  |
| APOD      | 6137  | 1.09 | 3.64 | 0.0002693 | 0.004  |
| CD163     | 887   | 1.06 | 3.50 | 0.0004666 | 0.006  |
| PRH2      | 3255  | 1.52 | 3.15 | 0.0016383 | 0.02   |
| H1-3      | 144   | 1.02 | 3.05 | 0.0022815 | 0.02   |
| PRB3      | 26511 | 1.47 | 2.98 | 0.0028657 | 0.03   |
| FOSB      | 812   | 1.46 | 2.97 | 0.0029993 | 0.03   |
| SAA1      | 8478  | 1.09 | 2.96 | 0.0030546 | 0.03   |
| COMP      | 185   | 1.18 | 2.91 | 0.0036188 | 0.03   |
| PRB1      | 6653  | 1.55 | 2.88 | 0.0039479 | 0.03   |
| PRB4      | 15992 | 1.59 | 2.85 | 0.0043256 | 0.03   |
| PRB2      | 6775  | 1.53 | 2.85 | 0.0043641 | 0.03   |



**Supplementary Table E4.** All downregulated differentially expressed genes in bronchial biopsies after 4 weeks of inhaled fluticasone (treatment group only). Log2 fold changes and statistical tests calculated using Wald tests in *DESeq2*. Genes shown are censored at FDR  $P < 0.05$  and log2 fold change of  $\pm 1$  and ordered by P value. FDR, false discovery rate.

**Genes downregulated in bronchial biopsies**

| <b>Gene</b>         | <b>Baseline read count</b> | <b>Log2 fold change</b> | <b>t</b> | <b>P value</b> | <b>FDR P value</b> |
|---------------------|----------------------------|-------------------------|----------|----------------|--------------------|
| FCER1A              | 228                        | -2.25                   | -11.91   | 1.01E-32       | 6.93E-29           |
| ZNF683 (Hobit)      | 131                        | -3.06                   | -10.10   | 5.78E-24       | 1.32E-20           |
| CD207<br>(Langerin) | 144                        | -2.90                   | -9.48    | 2.47E-21       | 4.24E-18           |
| HLA-DQB2            | 640                        | -1.51                   | -9.47    | 2.92E-21       | 4.63E-18           |
| TNFSF15             | 212                        | -1.56                   | -9.29    | 1.58E-20       | 2.32E-17           |
| CCL5 (RANTES)       | 1233                       | -2.15                   | -8.98    | 2.72E-19       | 2.67E-16           |
| IL33                | 6985                       | -1.24                   | -8.66    | 4.85E-18       | 3.70E-15           |
| P4HA3               | 105                        | -1.72                   | -8.64    | 5.40E-18       | 3.83E-15           |
| DPP4                | 481                        | -1.02                   | -8.62    | 6.91E-18       | 4.59E-15           |
| CD96                | 399                        | -1.64                   | -8.36    | 6.27E-17       | 3.49E-14           |
| THEMIS              | 146                        | -1.71                   | -8.36    | 6.14E-17       | 3.49E-14           |
| CLEC10A             | 199                        | -2.20                   | -8.33    | 8.31E-17       | 4.39E-14           |

|           |     |       |       |          |          |
|-----------|-----|-------|-------|----------|----------|
| CD8A      | 611 | -1.52 | -8.30 | 1.02E-16 | 5.11E-14 |
| CPVL      | 624 | -1.16 | -8.25 | 1.61E-16 | 7.91E-14 |
| TRGC2     | 103 | -1.98 | -8.23 | 1.93E-16 | 9.23E-14 |
| CD2       | 732 | -1.87 | -8.22 | 2.05E-16 | 9.60E-14 |
| TRBC2     | 741 | -2.07 | -8.08 | 6.67E-16 | 2.98E-13 |
| TRBC1     | 540 | -2.07 | -8.05 | 8.33E-16 | 3.65E-13 |
| TRAC      | 764 | -1.84 | -8.02 | 1.09E-15 | 4.48E-13 |
| DOCK10    | 713 | -1.55 | -7.90 | 2.77E-15 | 1.07E-12 |
| CCR5      | 426 | -1.91 | -7.90 | 2.90E-15 | 1.11E-12 |
| SERPINB10 | 350 | -1.42 | -7.88 | 3.41E-15 | 1.25E-12 |
| CD3G      | 114 | -1.74 | -7.82 | 5.49E-15 | 1.91E-12 |
| UBASH3A   | 123 | -1.92 | -7.78 | 7.42E-15 | 2.55E-12 |
| NA        | 131 | -3.10 | -7.71 | 1.29E-14 | 4.27E-12 |
| P2RY10    | 115 | -1.90 | -7.64 | 2.15E-14 | 6.71E-12 |
| SPN       | 381 | -1.55 | -7.61 | 2.65E-14 | 8.01E-12 |
| PIK3CG    | 263 | -1.59 | -7.34 | 2.17E-13 | 5.45E-11 |
| PTPN22    | 243 | -1.52 | -7.33 | 2.32E-13 | 5.76E-11 |
| RUFY4     | 117 | -1.54 | -7.28 | 3.44E-13 | 8.04E-11 |
| NAPSB     | 333 | -1.52 | -7.20 | 5.94E-13 | 1.38E-10 |
| GPRIN3    | 376 | -1.60 | -7.18 | 7.17E-13 | 1.62E-10 |
| PTPN7     | 312 | -1.64 | -7.12 | 1.07E-12 | 2.36E-10 |
| GFI1      | 177 | -1.23 | -7.11 | 1.14E-12 | 2.46E-10 |

|          |      |       |       |          |          |
|----------|------|-------|-------|----------|----------|
| DNASE1L3 | 156  | -1.79 | -7.10 | 1.29E-12 | 2.76E-10 |
| CCR6     | 142  | -1.27 | -7.09 | 1.30E-12 | 2.76E-10 |
| TARP     | 112  | -1.90 | -7.07 | 1.52E-12 | 3.18E-10 |
| IGHV1-46 | 241  | -2.93 | -7.00 | 2.62E-12 | 5.40E-10 |
| IGLV1-50 | 195  | -2.49 | -6.96 | 3.38E-12 | 6.83E-10 |
| ITGB7    | 427  | -1.12 | -6.85 | 7.46E-12 | 1.45E-09 |
| CPA3     | 913  | -1.98 | -6.84 | 7.90E-12 | 1.51E-09 |
| CD8B     | 206  | -1.38 | -6.79 | 1.09E-11 | 1.99E-09 |
| LCK      | 441  | -1.38 | -6.78 | 1.17E-11 | 2.11E-09 |
| KLRC2    | 101  | -1.29 | -6.77 | 1.26E-11 | 2.24E-09 |
| FPR3     | 291  | -1.65 | -6.77 | 1.28E-11 | 2.26E-09 |
| FCGR2B   | 224  | -1.57 | -6.76 | 1.34E-11 | 2.31E-09 |
| ELK2AP   | 1234 | -3.29 | -6.76 | 1.33E-11 | 2.31E-09 |
| HLA-DPB2 | 156  | -1.28 | -6.75 | 1.45E-11 | 2.49E-09 |
| ZNF831   | 150  | -1.54 | -6.74 | 1.56E-11 | 2.66E-09 |
| LY9      | 150  | -1.23 | -6.74 | 1.58E-11 | 2.67E-09 |
| TLR7     | 127  | -1.47 | -6.72 | 1.83E-11 | 2.99E-09 |
| COL6A5   | 136  | -3.00 | -6.68 | 2.45E-11 | 3.83E-09 |
| APLNR    | 328  | -3.17 | -6.67 | 2.49E-11 | 3.86E-09 |
| IGKV1D-8 | 209  | -2.99 | -6.67 | 2.54E-11 | 3.87E-09 |
| CD3D     | 291  | -1.64 | -6.66 | 2.74E-11 | 4.15E-09 |
| CXCR6    | 432  | -1.71 | -6.66 | 2.82E-11 | 4.21E-09 |

|              |      |       |       |          |          |
|--------------|------|-------|-------|----------|----------|
| IGHG4        | 4984 | -3.20 | -6.65 | 2.85E-11 | 4.22E-09 |
| IGHV3OR16-8  | 106  | -3.11 | -6.65 | 3.03E-11 | 4.43E-09 |
| CX3CR1       | 241  | -1.30 | -6.60 | 4.22E-11 | 5.96E-09 |
| HLA-DPB1     | 5797 | -1.25 | -6.58 | 4.73E-11 | 6.46E-09 |
| IKZF3        | 711  | -1.39 | -6.56 | 5.45E-11 | 7.33E-09 |
| IGKV1D-17    | 284  | -3.12 | -6.55 | 5.83E-11 | 7.79E-09 |
| IGKV2-40     | 197  | -2.98 | -6.54 | 6.18E-11 | 8.21E-09 |
| LOC642131    | 282  | -2.41 | -6.46 | 1.04E-10 | 1.32E-08 |
| IGHV4-4      | 204  | -2.84 | -6.46 | 1.05E-10 | 1.33E-08 |
| IGHV3-48     | 573  | -2.85 | -6.44 | 1.19E-10 | 1.50E-08 |
| LOC102724760 | 122  | -2.23 | -6.43 | 1.25E-10 | 1.55E-08 |
| HDAC9        | 686  | -1.14 | -6.42 | 1.39E-10 | 1.72E-08 |
| IGHV3-11     | 470  | -3.00 | -6.41 | 1.47E-10 | 1.81E-08 |
| HLA-DQA2     | 1904 | -1.36 | -6.40 | 1.51E-10 | 1.85E-08 |
| IGKV4-1      | 807  | -3.16 | -6.39 | 1.67E-10 | 2.03E-08 |
| IGKV1-8      | 247  | -3.17 | -6.39 | 1.71E-10 | 2.04E-08 |
| CCR2         | 290  | -1.84 | -6.39 | 1.70E-10 | 2.04E-08 |
| AKAP5        | 108  | -1.01 | -6.38 | 1.74E-10 | 2.07E-08 |
| LAX1         | 112  | -1.59 | -6.34 | 2.26E-10 | 2.63E-08 |
| NA           | 120  | -3.05 | -6.33 | 2.44E-10 | 2.80E-08 |
| IGKV1-16     | 430  | -3.31 | -6.33 | 2.52E-10 | 2.88E-08 |
| IGHJ6        | 119  | -2.63 | -6.32 | 2.61E-10 | 2.94E-08 |

|              |      |       |       |          |          |
|--------------|------|-------|-------|----------|----------|
| SAMSN1       | 213  | -1.51 | -6.32 | 2.64E-10 | 2.96E-08 |
| ITGA4        | 748  | -1.02 | -6.28 | 3.38E-10 | 3.67E-08 |
| IGHV3-35     | 105  | -2.78 | -6.25 | 4.02E-10 | 4.29E-08 |
| MYO7A        | 150  | -1.33 | -6.25 | 4.11E-10 | 4.37E-08 |
| SOSTDC1      | 219  | -1.12 | -6.25 | 4.22E-10 | 4.46E-08 |
| SLAMF1       | 162  | -1.78 | -6.24 | 4.33E-10 | 4.55E-08 |
| HLA-DQA1     | 3663 | -1.31 | -6.23 | 4.74E-10 | 4.93E-08 |
| HLA-DQB1     | 4235 | -1.04 | -6.22 | 5.10E-10 | 5.22E-08 |
| CD3E         | 601  | -1.38 | -6.21 | 5.34E-10 | 5.45E-08 |
| IGLV1-40     | 629  | -2.83 | -6.21 | 5.41E-10 | 5.49E-08 |
| IGHV4-55     | 245  | -2.58 | -6.20 | 5.79E-10 | 5.81E-08 |
| LOC102724971 | 328  | -2.49 | -6.19 | 6.07E-10 | 6.00E-08 |
| MPEG1        | 1046 | -1.51 | -6.19 | 6.15E-10 | 6.06E-08 |
| KEL          | 124  | -1.45 | -6.18 | 6.22E-10 | 6.10E-08 |
| IGHV4-31     | 178  | -2.80 | -6.18 | 6.51E-10 | 6.35E-08 |
| IGHV3-71     | 152  | -2.82 | -6.17 | 7.01E-10 | 6.75E-08 |
| SCML4        | 246  | -1.30 | -6.16 | 7.14E-10 | 6.83E-08 |
| SPOCK2       | 833  | -1.32 | -6.16 | 7.29E-10 | 6.95E-08 |
| IGKV1-6      | 331  | -3.00 | -6.15 | 7.53E-10 | 7.14E-08 |
| KLRC1        | 124  | -1.20 | -6.14 | 8.12E-10 | 7.63E-08 |
| IGKV3-7      | 256  | -2.97 | -6.11 | 9.70E-10 | 9.03E-08 |
| IGHV1-18     | 424  | -3.04 | -6.11 | 1.02E-09 | 9.44E-08 |

|           |       |       |       |          |          |
|-----------|-------|-------|-------|----------|----------|
| IGHG3     | 11442 | -3.13 | -6.10 | 1.04E-09 | 9.57E-08 |
| SASH3     | 585   | -1.44 | -6.08 | 1.19E-09 | 1.09E-07 |
| AOAH      | 400   | -1.28 | -6.07 | 1.32E-09 | 1.20E-07 |
| KCNA3     | 252   | -1.80 | -6.06 | 1.33E-09 | 1.20E-07 |
| CD226     | 204   | -1.21 | -6.06 | 1.33E-09 | 1.20E-07 |
| THY1      | 274   | -2.18 | -6.06 | 1.39E-09 | 1.24E-07 |
| IGKV3D-7  | 660   | -2.86 | -6.06 | 1.40E-09 | 1.24E-07 |
| GRAP2     | 236   | -1.54 | -6.05 | 1.47E-09 | 1.29E-07 |
| MS4A2     | 264   | -2.20 | -6.04 | 1.52E-09 | 1.34E-07 |
| IGKV1-13  | 363   | -2.98 | -6.02 | 1.75E-09 | 1.50E-07 |
| LCP2      | 550   | -1.32 | -6.02 | 1.76E-09 | 1.51E-07 |
| IGHV3-65  | 128   | -2.87 | -6.01 | 1.80E-09 | 1.53E-07 |
| IGKV3-15  | 1137  | -3.15 | -6.01 | 1.83E-09 | 1.54E-07 |
| KLRB1     | 226   | -1.50 | -6.00 | 2.01E-09 | 1.67E-07 |
| SLC5A7    | 236   | -1.20 | -5.98 | 2.17E-09 | 1.79E-07 |
| IGHV3-53  | 279   | -2.86 | -5.96 | 2.51E-09 | 2.02E-07 |
| IGKV1-17  | 498   | -3.15 | -5.96 | 2.59E-09 | 2.06E-07 |
| IGKV2D-40 | 196   | -3.05 | -5.96 | 2.58E-09 | 2.06E-07 |
| ZAP70     | 461   | -1.09 | -5.95 | 2.65E-09 | 2.10E-07 |
| JCHAIN    | 6687  | -2.83 | -5.95 | 2.72E-09 | 2.14E-07 |
| FAM78A    | 254   | -1.20 | -5.94 | 2.82E-09 | 2.20E-07 |
| IGHV3-72  | 126   | -2.97 | -5.92 | 3.20E-09 | 2.47E-07 |

|           |      |       |       |          |          |
|-----------|------|-------|-------|----------|----------|
| GPR171    | 112  | -1.39 | -5.92 | 3.23E-09 | 2.48E-07 |
| IGHV3-41  | 107  | -2.82 | -5.90 | 3.54E-09 | 2.68E-07 |
| IGKV1D-39 | 1300 | -3.05 | -5.89 | 3.97E-09 | 2.98E-07 |
| TESPA1    | 139  | -1.81 | -5.87 | 4.30E-09 | 3.18E-07 |
| IL10RA    | 654  | -1.26 | -5.87 | 4.34E-09 | 3.19E-07 |
| CD101     | 120  | -1.06 | -5.87 | 4.49E-09 | 3.25E-07 |
| IGHV3-43  | 129  | -2.72 | -5.86 | 4.53E-09 | 3.27E-07 |
| RASAL3    | 411  | -1.32 | -5.86 | 4.55E-09 | 3.27E-07 |
| IGHG2     | 8611 | -3.12 | -5.86 | 4.71E-09 | 3.34E-07 |
| IGKV2D-29 | 109  | -2.79 | -5.86 | 4.69E-09 | 3.34E-07 |
| IGLC5     | 323  | -2.34 | -5.86 | 4.70E-09 | 3.34E-07 |
| CD6       | 416  | -1.03 | -5.85 | 4.96E-09 | 3.51E-07 |
| IGKV3D-15 | 876  | -3.07 | -5.84 | 5.10E-09 | 3.59E-07 |
| IL12RB1   | 133  | -1.36 | -5.83 | 5.51E-09 | 3.85E-07 |
| CYSLTR1   | 265  | -1.27 | -5.82 | 6.06E-09 | 4.16E-07 |
| IGHV3-16  | 120  | -2.86 | -5.81 | 6.11E-09 | 4.18E-07 |
| IGHV3-21  | 634  | -2.84 | -5.81 | 6.17E-09 | 4.18E-07 |
| CD5       | 222  | -1.29 | -5.80 | 6.67E-09 | 4.44E-07 |
| IGKJ1     | 167  | -2.66 | -5.80 | 6.65E-09 | 4.44E-07 |
| GPR18     | 146  | -1.62 | -5.79 | 7.19E-09 | 4.74E-07 |
| IGHJ5     | 133  | -2.75 | -5.79 | 7.24E-09 | 4.76E-07 |
| IGKV1-9   | 517  | -2.87 | -5.78 | 7.61E-09 | 4.96E-07 |

|          |       |       |       |          |          |
|----------|-------|-------|-------|----------|----------|
| SEMA7A   | 113   | -1.33 | -5.77 | 7.74E-09 | 5.02E-07 |
| IGHV1-69 | 436   | -2.82 | -5.77 | 8.09E-09 | 5.22E-07 |
| IRF8     | 423   | -1.53 | -5.76 | 8.40E-09 | 5.37E-07 |
| IGHV3-66 | 270   | -2.86 | -5.75 | 8.77E-09 | 5.57E-07 |
| IGHJ4    | 276   | -2.81 | -5.74 | 9.32E-09 | 5.89E-07 |
| NCKAP1L  | 586   | -1.27 | -5.74 | 9.60E-09 | 6.02E-07 |
| IGHV2-70 | 103   | -2.79 | -5.73 | 9.81E-09 | 6.10E-07 |
| PTPRC    | 2347  | -1.50 | -5.72 | 1.07E-08 | 6.62E-07 |
| IGHG1    | 20412 | -3.19 | -5.72 | 1.08E-08 | 6.65E-07 |
| IGLV3-10 | 287   | -3.02 | -5.71 | 1.11E-08 | 6.77E-07 |
| IGHV3-22 | 137   | -3.04 | -5.71 | 1.14E-08 | 6.94E-07 |
| IL2RG    | 895   | -1.36 | -5.69 | 1.24E-08 | 7.51E-07 |
| IGHV3-73 | 145   | -2.50 | -5.68 | 1.37E-08 | 8.23E-07 |
| IGKV1-27 | 228   | -2.70 | -5.67 | 1.39E-08 | 8.28E-07 |
| IGKJ4    | 151   | -2.94 | -5.67 | 1.40E-08 | 8.29E-07 |
| GVINP1   | 471   | -1.20 | -5.66 | 1.49E-08 | 8.77E-07 |
| IGHV1-3  | 153   | -2.63 | -5.65 | 1.60E-08 | 9.36E-07 |
| IGLL1    | 306   | -2.06 | -5.65 | 1.59E-08 | 9.36E-07 |
| IGLJ3    | 102   | -2.58 | -5.63 | 1.80E-08 | 1.04E-06 |
| ITGAL    | 1102  | -1.06 | -5.63 | 1.81E-08 | 1.05E-06 |
| IGKC     | 23344 | -2.68 | -5.61 | 2.01E-08 | 1.15E-06 |
| GPR183   | 234   | -1.29 | -5.60 | 2.11E-08 | 1.20E-06 |



|           |      |       |       |          |          |
|-----------|------|-------|-------|----------|----------|
| IGKV2-28  | 772  | -2.72 | -5.59 | 2.26E-08 | 1.28E-06 |
| GGTA1     | 120  | -1.36 | -5.59 | 2.27E-08 | 1.28E-06 |
| IGKV1-39  | 1287 | -3.04 | -5.59 | 2.30E-08 | 1.30E-06 |
| IGKV2D-28 | 774  | -2.71 | -5.58 | 2.44E-08 | 1.37E-06 |
| PLPPR4    | 289  | -1.77 | -5.58 | 2.45E-08 | 1.37E-06 |
| IGKV1-12  | 672  | -2.91 | -5.56 | 2.63E-08 | 1.45E-06 |
| ITK       | 315  | -1.41 | -5.56 | 2.63E-08 | 1.45E-06 |
| TNFSF13B  | 182  | -1.52 | -5.56 | 2.68E-08 | 1.47E-06 |
| MXRA5     | 1567 | -1.59 | -5.56 | 2.72E-08 | 1.48E-06 |
| IGKV3-11  | 1105 | -2.67 | -5.53 | 3.26E-08 | 1.75E-06 |
| IGLV1-36  | 211  | -2.68 | -5.52 | 3.41E-08 | 1.83E-06 |
| FAM30A    | 135  | -2.14 | -5.51 | 3.59E-08 | 1.92E-06 |
| IGKV1D-16 | 506  | -2.97 | -5.51 | 3.68E-08 | 1.97E-06 |
| NREP      | 268  | -1.33 | -5.48 | 4.16E-08 | 2.19E-06 |
| IGHV1-24  | 187  | -2.82 | -5.47 | 4.53E-08 | 2.34E-06 |
| SLC8A1    | 473  | -1.28 | -5.46 | 4.74E-08 | 2.44E-06 |
| CD84      | 373  | -1.27 | -5.45 | 4.94E-08 | 2.54E-06 |
| CD48      | 435  | -1.40 | -5.45 | 5.14E-08 | 2.63E-06 |
| IGKV1D-12 | 661  | -2.87 | -5.44 | 5.27E-08 | 2.69E-06 |
| CD52      | 634  | -1.34 | -5.42 | 5.83E-08 | 2.94E-06 |
| IGKV2D-30 | 282  | -2.86 | -5.42 | 6.06E-08 | 3.03E-06 |
| MAP4K1    | 301  | -1.07 | -5.42 | 6.12E-08 | 3.05E-06 |

|           |      |       |       |          |          |
|-----------|------|-------|-------|----------|----------|
| GPR65     | 130  | -1.35 | -5.41 | 6.20E-08 | 3.09E-06 |
| IGKV3D-11 | 896  | -2.69 | -5.41 | 6.45E-08 | 3.19E-06 |
| SFRP4     | 611  | -3.05 | -5.40 | 6.58E-08 | 3.23E-06 |
| IGKV3D-20 | 798  | -2.78 | -5.40 | 6.63E-08 | 3.24E-06 |
| FGL2      | 1696 | -1.31 | -5.40 | 6.70E-08 | 3.26E-06 |
| ARHGAP15  | 232  | -1.28 | -5.39 | 7.18E-08 | 3.47E-06 |
| WDFY4     | 396  | -1.37 | -5.38 | 7.35E-08 | 3.54E-06 |
| TMC8      | 733  | -1.25 | -5.37 | 7.73E-08 | 3.71E-06 |
| IGHV3-23  | 906  | -2.77 | -5.34 | 9.44E-08 | 4.45E-06 |
| IGLV1-44  | 731  | -2.62 | -5.33 | 9.55E-08 | 4.48E-06 |
| FCRL5     | 100  | -2.24 | -5.33 | 9.78E-08 | 4.56E-06 |
| IGLV3-1   | 461  | -2.41 | -5.32 | 1.03E-07 | 4.76E-06 |
| LTB       | 185  | -1.86 | -5.32 | 1.04E-07 | 4.83E-06 |
| IGHV3-15  | 305  | -2.71 | -5.30 | 1.14E-07 | 5.27E-06 |
| IGKV2-24  | 164  | -2.75 | -5.30 | 1.17E-07 | 5.36E-06 |
| ITIH5     | 850  | -1.89 | -5.29 | 1.20E-07 | 5.50E-06 |
| MUC13     | 2187 | -1.32 | -5.29 | 1.21E-07 | 5.52E-06 |
| IGKV3-20  | 1887 | -2.72 | -5.29 | 1.22E-07 | 5.55E-06 |
| TPSAB1    | 1466 | -1.48 | -5.28 | 1.27E-07 | 5.69E-06 |
| IGKV2-30  | 344  | -2.83 | -5.27 | 1.33E-07 | 5.96E-06 |
| MZB1      | 299  | -1.71 | -5.27 | 1.34E-07 | 5.98E-06 |
| DIO2      | 843  | -2.15 | -5.27 | 1.34E-07 | 5.99E-06 |

|          |      |       |       |          |          |
|----------|------|-------|-------|----------|----------|
| IGHV3-74 | 299  | -2.53 | -5.24 | 1.63E-07 | 7.21E-06 |
| COL6A6   | 192  | -1.72 | -5.24 | 1.65E-07 | 7.23E-06 |
| IGHV4-61 | 624  | -2.44 | -5.23 | 1.70E-07 | 7.47E-06 |
| VASH1    | 655  | -1.08 | -5.21 | 1.87E-07 | 8.07E-06 |
| IGHV4-34 | 248  | -2.45 | -5.20 | 1.94E-07 | 8.31E-06 |
| NA       | 289  | -1.36 | -5.20 | 2.00E-07 | 8.55E-06 |
| PDE4B    | 265  | -1.30 | -5.19 | 2.11E-07 | 9.00E-06 |
| GZMH     | 134  | -1.44 | -5.19 | 2.14E-07 | 9.07E-06 |
| IGHV3-49 | 224  | -2.73 | -5.18 | 2.18E-07 | 9.22E-06 |
| TPSB2    | 1643 | -1.47 | -5.18 | 2.21E-07 | 9.33E-06 |
| PARP15   | 244  | -1.11 | -5.18 | 2.22E-07 | 9.33E-06 |
| CD247    | 226  | -1.24 | -5.17 | 2.32E-07 | 9.61E-06 |
| IGHV4-39 | 523  | -2.51 | -5.17 | 2.36E-07 | 9.74E-06 |
| IGHV3-33 | 980  | -2.65 | -5.17 | 2.38E-07 | 9.81E-06 |
| DOCK2    | 679  | -1.24 | -5.16 | 2.45E-07 | 1.01E-05 |
| TBC1D10C | 441  | -1.09 | -5.16 | 2.50E-07 | 1.03E-05 |
| IGLV1-47 | 660  | -2.50 | -5.15 | 2.56E-07 | 1.05E-05 |
| ZBP1     | 101  | -1.51 | -5.15 | 2.60E-07 | 1.06E-05 |
| ROBO2    | 365  | -1.92 | -5.15 | 2.63E-07 | 1.07E-05 |
| GBP5     | 1043 | -1.17 | -5.14 | 2.71E-07 | 1.10E-05 |
| GZMA     | 253  | -1.21 | -5.13 | 2.89E-07 | 1.17E-05 |
| IGHV5-51 | 316  | -2.56 | -5.13 | 2.93E-07 | 1.18E-05 |

|           |      |       |       |          |          |
|-----------|------|-------|-------|----------|----------|
| IL32      | 775  | -1.55 | -5.12 | 3.01E-07 | 1.21E-05 |
| IGLV2-18  | 357  | -2.53 | -5.11 | 3.23E-07 | 1.28E-05 |
| CTSW      | 175  | -1.24 | -5.11 | 3.27E-07 | 1.29E-05 |
| ABI3BP    | 1371 | -1.57 | -5.11 | 3.30E-07 | 1.30E-05 |
| PLEK      | 620  | -1.18 | -5.10 | 3.45E-07 | 1.35E-05 |
| CXCL9     | 1772 | -2.90 | -5.09 | 3.54E-07 | 1.37E-05 |
| IRF4      | 217  | -1.78 | -5.08 | 3.85E-07 | 1.48E-05 |
| ADAM19    | 400  | -1.61 | -5.07 | 3.90E-07 | 1.49E-05 |
| IGHV3-20  | 192  | -2.67 | -5.07 | 3.94E-07 | 1.50E-05 |
| IGHV3-13  | 179  | -2.51 | -5.07 | 4.00E-07 | 1.52E-05 |
| FYB1      | 777  | -1.29 | -5.06 | 4.21E-07 | 1.59E-05 |
| MAF       | 331  | -1.01 | -5.03 | 4.91E-07 | 1.82E-05 |
| IGKV1-33  | 744  | -2.82 | -5.02 | 5.11E-07 | 1.88E-05 |
| IGKV1D-33 | 746  | -2.81 | -5.01 | 5.53E-07 | 2.01E-05 |
| CD28      | 114  | -1.90 | -5.00 | 5.66E-07 | 2.06E-05 |
| IGKV1D-13 | 393  | -2.65 | -5.00 | 5.72E-07 | 2.08E-05 |
| CD22      | 154  | -1.64 | -4.98 | 6.39E-07 | 2.31E-05 |
| MCOLN2    | 210  | -1.08 | -4.97 | 6.73E-07 | 2.41E-05 |
| SEPTIN1   | 337  | -1.09 | -4.97 | 6.73E-07 | 2.41E-05 |
| TGFB3     | 627  | -1.00 | -4.97 | 6.80E-07 | 2.43E-05 |
| IGKV1-5   | 1078 | -2.60 | -4.97 | 6.83E-07 | 2.43E-05 |
| JAML      | 795  | -1.13 | -4.96 | 6.91E-07 | 2.46E-05 |

|          |      |       |       |          |          |
|----------|------|-------|-------|----------|----------|
| TNFSF14  | 189  | -1.11 | -4.96 | 7.06E-07 | 2.50E-05 |
| IGLV2-34 | 320  | -2.26 | -4.94 | 7.85E-07 | 2.75E-05 |
| IGHV3-7  | 662  | -2.70 | -4.92 | 8.44E-07 | 2.92E-05 |
| DCHS2    | 155  | -1.36 | -4.92 | 8.44E-07 | 2.92E-05 |
| LAIR1    | 382  | -1.07 | -4.92 | 8.67E-07 | 2.99E-05 |
| HLA-DOA  | 1286 | -1.03 | -4.92 | 8.66E-07 | 2.99E-05 |
| IKZF1    | 697  | -1.10 | -4.92 | 8.86E-07 | 3.05E-05 |
| LCP1     | 3622 | -1.18 | -4.90 | 9.49E-07 | 3.23E-05 |
| UBD      | 1644 | -1.66 | -4.90 | 9.71E-07 | 3.30E-05 |
| COL14A1  | 1515 | -1.60 | -4.88 | 1.03E-06 | 3.50E-05 |
| PARVG    | 535  | -1.14 | -4.88 | 1.04E-06 | 3.52E-05 |
| HLA-DOB  | 121  | -1.40 | -4.86 | 1.20E-06 | 3.97E-05 |
| MS4A6A   | 704  | -1.07 | -4.85 | 1.22E-06 | 4.01E-05 |
| IGHV1-2  | 339  | -2.66 | -4.85 | 1.21E-06 | 4.01E-05 |
| CARMIL2  | 163  | -1.29 | -4.84 | 1.33E-06 | 4.35E-05 |
| HSPA7    | 295  | -1.18 | -4.83 | 1.34E-06 | 4.37E-05 |
| OASL     | 178  | -1.40 | -4.83 | 1.37E-06 | 4.46E-05 |
| IGHV4-28 | 141  | -2.63 | -4.83 | 1.37E-06 | 4.48E-05 |
| TRAF3IP3 | 415  | -1.08 | -4.82 | 1.42E-06 | 4.60E-05 |
| GNG2     | 328  | -1.20 | -4.82 | 1.46E-06 | 4.71E-05 |
| IGHV4-59 | 655  | -2.38 | -4.81 | 1.53E-06 | 4.89E-05 |
| DOK2     | 182  | -1.12 | -4.80 | 1.57E-06 | 5.02E-05 |

|          |      |       |       |          |          |
|----------|------|-------|-------|----------|----------|
| IGHV3-30 | 938  | -2.53 | -4.77 | 1.80E-06 | 5.66E-05 |
| IGLV2-23 | 1054 | -2.19 | -4.75 | 2.05E-06 | 6.32E-05 |
| HMCN1    | 1660 | -1.38 | -4.73 | 2.28E-06 | 6.97E-05 |
| AGAP2    | 141  | -1.19 | -4.73 | 2.28E-06 | 6.97E-05 |
| P2RY13   | 209  | -1.33 | -4.70 | 2.54E-06 | 7.63E-05 |
| IGLC7    | 666  | -2.35 | -4.69 | 2.68E-06 | 8.02E-05 |
| IGHV2-5  | 149  | -2.67 | -4.68 | 2.83E-06 | 8.42E-05 |
| IFI44L   | 1914 | -1.28 | -4.67 | 2.95E-06 | 8.73E-05 |
| TPSD1    | 222  | -1.39 | -4.67 | 3.00E-06 | 8.84E-05 |
| MMP9     | 101  | -2.15 | -4.67 | 3.02E-06 | 8.87E-05 |
| IGLC3    | 8964 | -2.26 | -4.66 | 3.17E-06 | 9.24E-05 |
| IGLV3-9  | 121  | -2.63 | -4.65 | 3.25E-06 | 9.41E-05 |
| CORO1A   | 1616 | -1.12 | -4.64 | 3.48E-06 | 9.97E-05 |
| CD7      | 197  | -1.33 | -4.62 | 3.75E-06 | 0.0001   |
| CCL19    | 838  | -2.77 | -4.58 | 4.59E-06 | 0.0001   |
| FGF1     | 139  | -1.50 | -4.58 | 4.69E-06 | 0.0001   |
| LAMA4    | 1644 | -1.26 | -4.57 | 4.78E-06 | 0.0001   |
| COL10A1  | 203  | -1.26 | -4.57 | 4.91E-06 | 0.0001   |
| EXOC3L4  | 157  | -1.02 | -4.57 | 4.99E-06 | 0.0001   |
| OLFML2B  | 324  | -1.19 | -4.52 | 6.05E-06 | 0.0002   |
| IGLV2-11 | 811  | -2.36 | -4.52 | 6.06E-06 | 0.0002   |
| GBP4     | 2156 | -1.01 | -4.51 | 6.58E-06 | 0.0002   |

|          |       |       |       |          |        |
|----------|-------|-------|-------|----------|--------|
| SLITRK5  | 116   | -1.19 | -4.50 | 6.83E-06 | 0.0002 |
| RAC2     | 950   | -1.06 | -4.49 | 7.00E-06 | 0.0002 |
| TFEC     | 124   | -1.12 | -4.45 | 8.76E-06 | 0.0002 |
| IGLV7-46 | 101   | -2.68 | -4.44 | 9.04E-06 | 0.0002 |
| PSTPIP1  | 195   | -1.10 | -4.43 | 9.36E-06 | 0.0002 |
| IGLV2-14 | 1781  | -2.27 | -4.43 | 9.49E-06 | 0.0002 |
| IGLL5    | 1198  | -2.26 | -4.41 | 1.03E-05 | 0.0003 |
| IGHA2    | 7043  | -2.08 | -4.40 | 1.10E-05 | 0.0003 |
| BTK      | 207   | -1.15 | -4.40 | 1.10E-05 | 0.0003 |
| IGHA1    | 21057 | -1.97 | -4.39 | 1.13E-05 | 0.0003 |
| COL1A2   | 4278  | -2.00 | -4.37 | 1.24E-05 | 0.0003 |
| MS4A1    | 361   | -1.48 | -4.36 | 1.30E-05 | 0.0003 |
| IGLV2-8  | 858   | -2.32 | -4.35 | 1.34E-05 | 0.0003 |
| IGLV6-57 | 182   | -2.41 | -4.34 | 1.41E-05 | 0.0003 |
| VCAM1    | 351   | -2.08 | -4.34 | 1.42E-05 | 0.0003 |
| GUCY1A1  | 779   | -1.28 | -4.34 | 1.43E-05 | 0.0003 |
| ECM2     | 493   | -1.11 | -4.31 | 1.60E-05 | 0.0004 |
| MRC2     | 872   | -1.26 | -4.31 | 1.67E-05 | 0.0004 |
| AIF1     | 471   | -1.09 | -4.30 | 1.71E-05 | 0.0004 |
| GUCY1A2  | 178   | -1.80 | -4.27 | 1.98E-05 | 0.0004 |
| IGLV3-19 | 292   | -2.58 | -4.26 | 2.03E-05 | 0.0005 |
| IGLC2    | 11569 | -2.16 | -4.25 | 2.15E-05 | 0.0005 |

|           |      |       |       |          |        |
|-----------|------|-------|-------|----------|--------|
| LINC00861 | 116  | -1.33 | -4.25 | 2.17E-05 | 0.0005 |
| ITLN1     | 171  | -1.70 | -4.24 | 2.28E-05 | 0.0005 |
| CYBB      | 986  | -1.16 | -4.23 | 2.35E-05 | 0.0005 |
| MYO1G     | 305  | -1.08 | -4.23 | 2.36E-05 | 0.0005 |
| HCST      | 131  | -1.08 | -4.22 | 2.42E-05 | 0.0005 |
| IGLV3-25  | 461  | -2.37 | -4.21 | 2.59E-05 | 0.0006 |
| CXCL14    | 1612 | -1.69 | -4.20 | 2.67E-05 | 0.0006 |
| ST8SIA6   | 120  | -1.01 | -4.20 | 2.72E-05 | 0.0006 |
| CALHM6    | 166  | -1.11 | -4.19 | 2.85E-05 | 0.0006 |
| TNFAIP8L2 | 112  | -1.00 | -4.18 | 2.93E-05 | 0.0006 |
| SLCO2B1   | 822  | -1.02 | -4.17 | 2.99E-05 | 0.0006 |
| GAPT      | 104  | -1.08 | -4.17 | 3.00E-05 | 0.0006 |
| IGLV3-21  | 537  | -2.08 | -4.15 | 3.35E-05 | 0.0007 |
| POSTN     | 3332 | -1.07 | -4.14 | 3.45E-05 | 0.0007 |
| COL3A1    | 4570 | -2.19 | -4.14 | 3.50E-05 | 0.0007 |
| LUM       | 1511 | -2.45 | -4.13 | 3.56E-05 | 0.0007 |
| COL1A1    | 2141 | -1.21 | -4.13 | 3.62E-05 | 0.0007 |
| LILRB1    | 247  | -1.17 | -4.13 | 3.65E-05 | 0.0007 |
| FREM1     | 220  | -1.59 | -4.07 | 4.66E-05 | 0.0009 |
| PTGDS     | 1569 | -2.07 | -4.06 | 4.83E-05 | 0.001  |
| CXCL10    | 1155 | -2.14 | -4.06 | 4.92E-05 | 0.001  |
| NTRK2     | 298  | -1.13 | -3.99 | 6.56E-05 | 0.001  |



|         |      |       |       |          |       |
|---------|------|-------|-------|----------|-------|
| CCL21   | 326  | -2.04 | -3.98 | 7.03E-05 | 0.001 |
| SIGLEC1 | 217  | -1.11 | -3.97 | 7.21E-05 | 0.001 |
| P2RX7   | 112  | -1.00 | -3.96 | 7.39E-05 | 0.001 |
| EDNRA   | 635  | -1.04 | -3.91 | 9.37E-05 | 0.002 |
| HGF     | 151  | -1.61 | -3.90 | 9.68E-05 | 0.002 |
| IGHD    | 1230 | -1.83 | -3.87 | 0.0001   | 0.002 |
| ENPP2   | 666  | -1.24 | -3.85 | 0.0001   | 0.002 |
| F2RL2   | 166  | -1.28 | -3.79 | 0.0001   | 0.002 |
| SLC2A14 | 123  | -1.13 | -3.79 | 0.0002   | 0.002 |
| NKG7    | 230  | -1.22 | -3.78 | 0.0002   | 0.003 |
| CXCL12  | 1272 | -1.58 | -3.77 | 0.0002   | 0.003 |
| PTGS1   | 437  | -1.05 | -3.77 | 0.0002   | 0.003 |
| CTHRC1  | 101  | -1.38 | -3.73 | 0.0002   | 0.003 |
| CST7    | 123  | -1.09 | -3.69 | 0.0002   | 0.003 |
| PRRX1   | 757  | -1.26 | -3.66 | 0.0003   | 0.004 |
| MATN2   | 1086 | -1.02 | -3.66 | 0.0003   | 0.004 |
| F13A1   | 1017 | -1.65 | -3.66 | 0.0003   | 0.004 |
| CD79A   | 220  | -1.56 | -3.64 | 0.0003   | 0.004 |
| ASPN    | 719  | -1.63 | -3.62 | 0.0003   | 0.004 |
| LSAMP   | 674  | -1.32 | -3.61 | 0.0003   | 0.004 |
| LST1    | 257  | -1.01 | -3.54 | 0.0004   | 0.005 |
| TMEM119 | 351  | -1.52 | -3.51 | 0.0004   | 0.006 |

|         |      |       |       |        |       |
|---------|------|-------|-------|--------|-------|
| TFF1    | 113  | -1.30 | -3.51 | 0.0004 | 0.006 |
| CSF2RB  | 701  | -1.18 | -3.51 | 0.0005 | 0.006 |
| COL5A1  | 923  | -1.42 | -3.50 | 0.0005 | 0.006 |
| OLFML1  | 306  | -1.13 | -3.50 | 0.0005 | 0.006 |
| CHI3L2  | 187  | -1.52 | -3.50 | 0.0005 | 0.006 |
| LDB2    | 637  | -1.11 | -3.45 | 0.0006 | 0.007 |
| JAK3    | 641  | -1.01 | -3.45 | 0.0006 | 0.007 |
| SGIP1   | 107  | -1.50 | -3.44 | 0.0006 | 0.007 |
| CXCL11  | 313  | -2.05 | -3.43 | 0.0006 | 0.008 |
| CPNE5   | 140  | -1.01 | -3.41 | 0.0007 | 0.008 |
| ADGRA2  | 810  | -1.35 | -3.40 | 0.0007 | 0.008 |
| FNDC1   | 113  | -1.39 | -3.39 | 0.0007 | 0.008 |
| IGHM    | 2170 | -1.54 | -3.38 | 0.0007 | 0.009 |
| EGFLAM  | 116  | -1.27 | -3.36 | 0.0008 | 0.009 |
| PLA2G4C | 205  | -1.09 | -3.35 | 0.0008 | 0.010 |
| CEACAM5 | 2470 | -1.07 | -3.33 | 0.0009 | 0.010 |
| JAM2    | 720  | -1.10 | -3.28 | 0.0010 | 0.012 |
| CLIC2   | 381  | -1.00 | -3.27 | 0.0011 | 0.012 |
| PI16    | 645  | -1.54 | -3.23 | 0.0012 | 0.013 |
| FAM111B | 100  | -1.16 | -3.21 | 0.0013 | 0.014 |
| ABCB1   | 521  | -1.08 | -3.19 | 0.0014 | 0.015 |
| MMP10   | 3182 | -1.01 | -3.19 | 0.0014 | 0.015 |

|         |      |       |       |        |       |
|---------|------|-------|-------|--------|-------|
| DPT     | 1681 | -1.72 | -3.18 | 0.0014 | 0.015 |
| TSPAN18 | 337  | -1.04 | -3.18 | 0.0015 | 0.015 |
| COL15A1 | 2580 | -1.70 | -3.17 | 0.0015 | 0.016 |
| OGN     | 554  | -1.47 | -3.15 | 0.0016 | 0.016 |
| EPHA3   | 338  | -1.13 | -3.15 | 0.0016 | 0.016 |
| FRZB    | 237  | -1.27 | -3.12 | 0.0018 | 0.018 |
| CD248   | 132  | -1.18 | -3.08 | 0.0020 | 0.019 |
| GLI1    | 116  | -1.10 | -3.06 | 0.0022 | 0.021 |
| COL8A1  | 243  | -1.20 | -3.05 | 0.0023 | 0.021 |
| PREX2   | 323  | -1.35 | -3.01 | 0.0026 | 0.024 |
| CACNA1C | 281  | -1.04 | -2.99 | 0.0028 | 0.025 |
| BGN     | 2401 | -1.49 | -2.98 | 0.0028 | 0.025 |
| COLEC12 | 198  | -1.02 | -2.98 | 0.0029 | 0.025 |
| SPON1   | 1268 | -1.14 | -2.98 | 0.0029 | 0.025 |
| CLEC3B  | 216  | -1.17 | -2.98 | 0.0029 | 0.025 |
| SELE    | 306  | -1.67 | -2.97 | 0.0029 | 0.026 |
| TEK     | 353  | -1.15 | -2.92 | 0.0035 | 0.029 |
| FAT4    | 1574 | -1.15 | -2.86 | 0.0042 | 0.034 |
| FLRT2   | 373  | -1.46 | -2.85 | 0.0043 | 0.035 |
| IDO1    | 1607 | -1.46 | -2.85 | 0.0044 | 0.035 |
| HAS2    | 115  | -1.18 | -2.83 | 0.0047 | 0.037 |
| BCHE    | 209  | -1.68 | -2.82 | 0.0048 | 0.038 |

|         |      |       |       |        |       |
|---------|------|-------|-------|--------|-------|
| MEOX1   | 415  | -1.45 | -2.81 | 0.0049 | 0.038 |
| DNM3OS  | 178  | -1.04 | -2.81 | 0.0049 | 0.038 |
| ZNF385D | 246  | -1.30 | -2.81 | 0.0050 | 0.038 |
| COL6A2  | 3477 | -1.39 | -2.79 | 0.0053 | 0.040 |
| SELP    | 623  | -1.22 | -2.76 | 0.0057 | 0.043 |
| GREM2   | 293  | -1.12 | -2.76 | 0.0058 | 0.043 |
| HPSE2   | 200  | -1.43 | -2.74 | 0.0062 | 0.045 |
| MOXD1   | 438  | -1.21 | -2.73 | 0.0064 | 0.046 |

**Supplementary Table E5 Geneset enrichment analysis for top 10 differentially enriched gene ontology pathways in bronchial brushes**

Gene ontology (GO) pathways significantly differentially expressed after 4 weeks of inhaled fluticasone (treatment group only) using Limma. Pathways shown are censored at Benjamin Hochberg adjusted  $P < 0.05$  and ordered by P value. Under figure x axis represents approximate gene ranks. NES, normalised enrichment score.

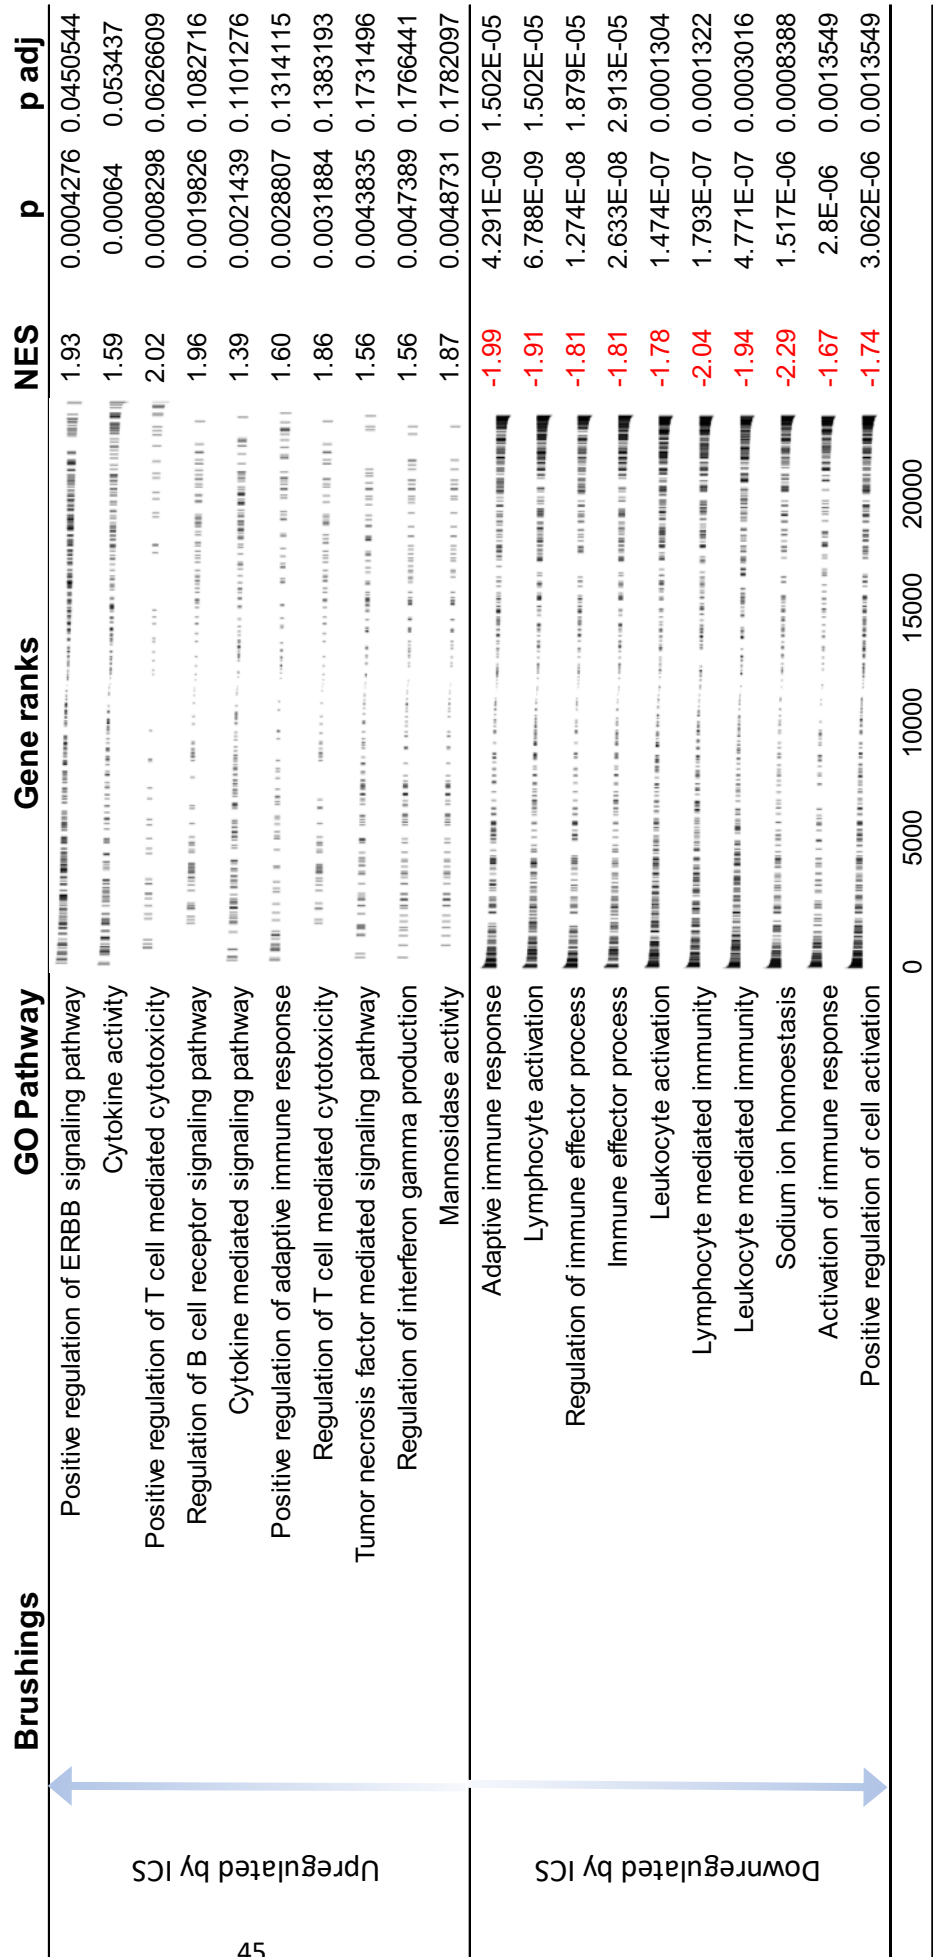

**Supplementary Table E6. Geneset enrichment analysis for top 10 differentially enriched gene ontology pathways in bronchial biopsies.**

Gene ontology (GO) pathways significantly differentially expressed after 4 weeks of inhaled fluticasone (treatment group only) using Limma. Pathways shown are censored at Benjamini Hochberg adjusted  $P < 0.05$  and ordered by P value. Under figure x axis represents approximate gene ranks. NES, normalised enrichment score.

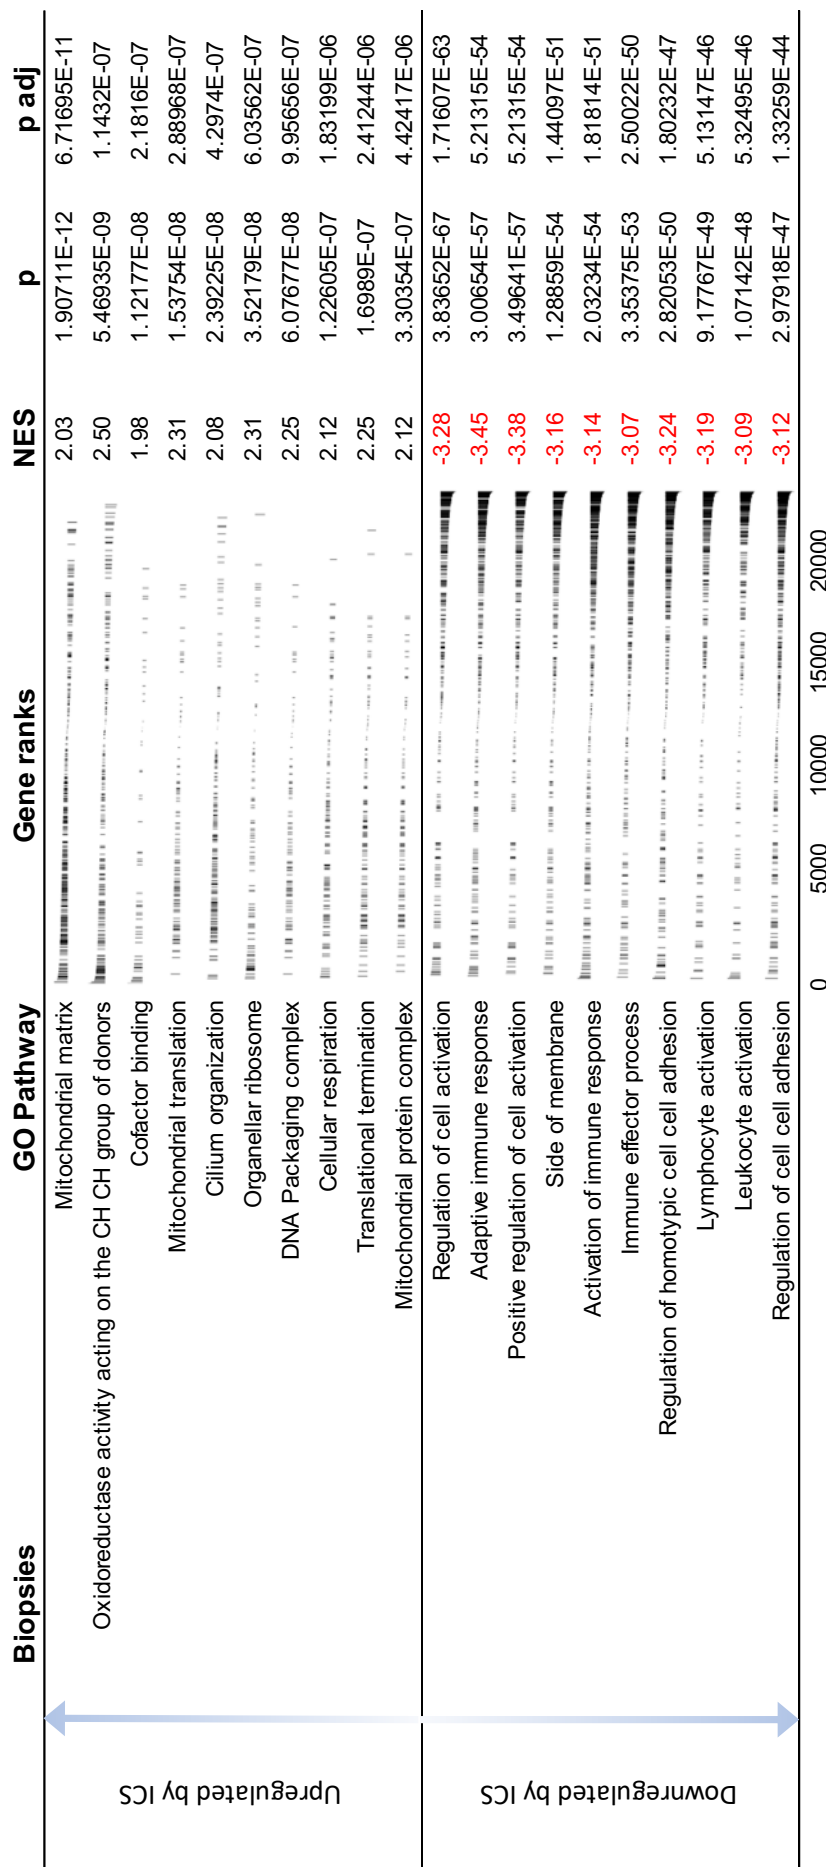

**Supplementary Table E7. Geneset enrichment analysis for top 6 differentially enriched type 2 immunity related genes in bronchial biopsies stratified by atopic status.**

Type 2 immunity related genes from the top 20 most downregulated genes in bronchial biopsies, stratified by atopic status, after 4 weeks of inhaled fluticasone (treatment group only). Log2 fold changes and statistical tests calculated using Wald tests in *DESeq2*. Genes shown are censored at FDR  $P < 0.05$  and  $\log(2)$  fold change of  $\pm 1$  and ordered by P value. FDR, false discovery rate.

| Atopic     |                     |                  |           |             |             |                                                                                                           | Functional role |
|------------|---------------------|------------------|-----------|-------------|-------------|-----------------------------------------------------------------------------------------------------------|-----------------|
| Gene       | Baseline read count | Log2 fold change | t         | P value     | FDR P value | Comments and aliases                                                                                      | Functional role |
| FCER1A     | 222                 | <b>-2.73</b>     | -6.73E+00 | 1.66865E-11 | 7E-09       | High affinity IgE receptor; expressed on airway mast cells and dendritic cells.                           | Type 2 immunity |
| CLEC10A    | 140                 | <b>-2.71</b>     | -7.49E+00 | 7.12098E-14 | 5.53E-11    | C-Type Lectin Domain Containing 10A; CD301: marker for alternatively activated macrophages.               | Type 2 immunity |
| SERPINB10  | 461                 | <b>-1.98</b>     | -5.95E+00 | 2.71106E-09 | 5.81E-07    | Serpin Family B Member 10; inhibits Th2 cell apoptosis, highly upregulated on airway epithelium by IL-13. | Type 2 immunity |
| CCR5       | 249                 | <b>-2.24</b>     | -4.81E+00 | 1.54656E-06 | 0.000135    | Ligands include CCL5 (RANTES), MCP-2, MIP-1a, MIP-1b. Chemotactic for T2-induced eosinophils.             | Type 2 immunity |
| CPA3       | 1183                | <b>-2.44</b>     | -5.95E+00 | 2.67853E-09 | 5.81E-07    | Carboxypeptidase A3: mast cell-specific peptidase located in secretory granules.                          | Type 2 immunity |
| IL33       | 5828                | <b>-1.27</b>     | -1.11E+01 | 1.44025E-28 | 1.34E-24    | Interleukin 33; airway epithelial cell alarmin which acts via ST2 to promote type-2 responses.            | Type 2 immunity |
| Non-atopic |                     |                  |           |             |             |                                                                                                           | Functional role |
| Gene       | Baseline read count | Log2 fold change | t         | P value     | FDR P value | Comments and aliases                                                                                      | Functional role |
| FCER1A     | 229                 | <b>-2.09</b>     | -1.05E+01 | 1.11539E-25 | 5.26E-22    | High affinity IgE receptor; expressed on airway mast cells and dendritic cells.                           | Type 2 immunity |
| CLEC10A    | 220                 | <b>-2.01</b>     | -6.30E+00 | 2.91008E-10 | 8.57E-08    | C-Type Lectin Domain Containing 10A; CD301: marker for alternatively activated macrophages.               | Type 2 immunity |
| SERPINB10  | 303                 | <b>-1.24</b>     | -6.38E+00 | 1.7865E-10  | 5.71E-08    | Serpin Family B Member 10; inhibits Th2 cell apoptosis, highly upregulated on airway epithelium by IL-13. | Type 2 immunity |
| CCR5       | 494                 | <b>-1.80</b>     | -6.68E+00 | 2.4352E-11  | 9.56E-09    | Ligands include CCL5 (RANTES), MCP-2, MIP-1a, MIP-1b. Chemotactic for T2-induced eosinophils.             | Type 2 immunity |
| CPA3       | 796                 | <b>-1.81</b>     | -5.33E+00 | 1.00291E-07 | 1.07E-05    | Carboxypeptidase A3: mast cell-specific peptidase located in secretory granules.                          | Type 2 immunity |
| IL33       | 7389                | <b>-1.22</b>     | -6.63E+00 | 3.36904E-11 | 1.27E-08    | Interleukin 33; airway epithelial cell alarmin which acts via ST2 to promote type-2 responses.            | Type 2 immunity |

**Supplementary Table E8. Cell deconvolution analysis.**

Cell deconvolution analysis was performed on bronchial biopsies using MuSiC to predict changes in cell numbers between day 0 and week 4 of ICS therapy, ordered by geneset normalised enrichment score.

| Biopsies                       | Geneset                          | Gene ranks                       | NES   | p        | p adj    |          |
|--------------------------------|----------------------------------|----------------------------------|-------|----------|----------|----------|
| Upregulated by ICS             | Lipofibroblast                   |                                  | 1.25  | 0.085    | 0.1      |          |
|                                | Differentiating basal cells      |                                  | 1.16  | 0.13     | 0.15     |          |
|                                | Alveolar type 2 epithelial cells |                                  | 1.15  | 0.17     | 0.2      |          |
|                                | Neuroendocrine cells             |                                  | 0.98  | 0.5      | 0.6      |          |
|                                | Proliferating NKT cells          |                                  | 0.94  | 0.6      | 0.7      |          |
|                                | Fibromyocyte cells               |                                  | 0.87  | 0.7      | 0.7      |          |
|                                | Lung serous cells                |                                  | 0.90  | 0.7      | 0.7      |          |
|                                | Downregulated by ICS             | Plasmacytoid dendritic cells     |       | -2.34    | 7.50E-10 | 3.20E-09 |
|                                |                                  | Lung basophil/ mast cells        |       | -2.04    | 4.80E-10 | 2.30E-09 |
|                                |                                  | Lung CD8 effector memory T cells |       | -2.60    | 2.60E-10 | 1.40E-09 |
| Lung CD4 naïve T cells         |                                  |                                  | -2.38 | 6.00E-11 | 3.60E-10 |          |
| Lung natural killer T cells    |                                  |                                  | -2.72 | 3.50E-12 | 2.40E-11 |          |
| Lung classical monocytes       |                                  |                                  | -2.30 | 1.80E-14 | 1.50E-13 |          |
| Lung natural killer cells      |                                  |                                  | -2.91 | 1.80E-21 | 1.90E-20 |          |
| Lung B cells                   |                                  |                                  | -2.83 | 8.30E-22 | 1.20E-20 |          |
| Lung CD4 effector memory cells |                                  |                                  | -3.06 | 2.30E-22 | 4.80E-21 |          |
| Lung CD8 naïve T cells         |                                  |                                  | -3.30 | 1.20E-35 | 4.90E-34 |          |



**Supplementary Table E9. Estimated cell type-specific effects of ICS.**

Cell-type specific differential gene expression effects of ICS were estimated using TOAST in R, on proportions of 5 different epithelial and structural cell types (multiciliated, basal resting, peribronchial fibroblasts, club and suprabasal), estimated using MuSiC deconvolution. Genes with FDR  $P < 0.05$  are shown, ranked by FDR. TOAST defines the effect size as  $\beta/(\mu + \beta/2)$ , where  $\mu$  is base-line expression in one group and  $\beta$  is the gene expression difference between two groups.

No genes passed FDR  $P < 0.05$  for club, peribronchial fibroblasts, basal resting cells in bronchial biopsies, nor for any of these cell types in bronchial brushings.

| Cell type   | Bronchial biopsies |         |         |             |             | Multiciliated epithelial cells |      |      |             |             |
|-------------|--------------------|---------|---------|-------------|-------------|--------------------------------|------|------|-------------|-------------|
|             | Gene               | Beta    | Mu      | Effect Size | FDR P value | Gene                           | Beta | Mu   | Effect Size | FDR P value |
| ICS effects | Suprabasal         |         |         |             |             |                                |      |      |             |             |
|             | PLA2G2D            | -9545   | 9949.49 | -1.84       | 4E-06       | FYB2                           | 3420 | 4766 | 0.53        | 1E-06       |
|             | CD19               | -25642  | 32105   | -1.33       | 6E-06       | PKIB                           | 2944 | 1768 | 0.91        | 1E-06       |
|             | TRBC2              | -174113 | 149746  | -2.78       | 6E-06       | KPNA7                          | 393  | 541  | 0.53        | 2E-06       |
|             | SPIB               | -31910  | 33126.7 | -1.86       | 7E-06       |                                |      |      |             |             |
|             | TBC1D27P           | -7883   | 8849    | -1.61       | 1E-05       |                                |      |      |             |             |
|             | ADGRG5             | -17595  | 16308   | -2.34       | 1E-05       |                                |      |      |             |             |
|             | GRM4               | -7938   | 7942    | -2.00       | 1E-05       |                                |      |      |             |             |
|             | VPREB3             | -5030   | 5814    | -1.52       | 2E-05       |                                |      |      |             |             |
|             | DTX1               | -8072   | 8683    | -1.74       | 2E-05       |                                |      |      |             |             |
|             | LGALS2             | -29090  | 23715   | -3.17       | 2E-05       |                                |      |      |             |             |
|             | CD3D               | -62103  | 52710   | -2.87       | 2E-05       |                                |      |      |             |             |
|             | TLR10              | -25362  | 27161   | -1.75       | 2E-05       |                                |      |      |             |             |
|             | GNGT2              | -12364  | 10994   | -2.57       | 2E-05       |                                |      |      |             |             |
|             | MSC                | -9841   | 7157    | -4.40       | 2E-05       |                                |      |      |             |             |
|             | TNFRSF9            | -5818   | 5590    | -2.17       | 3E-05       |                                |      |      |             |             |
|             | UNC5B-AS1          | 7423    | 6748    | 0.71        | 3E-05       |                                |      |      |             |             |
|             | PDCD1              | -14784  | 13583   | -2.39       | 4E-05       |                                |      |      |             |             |
|             | TIFAB              | -5028   | 4302    | -2.81       | 4E-05       |                                |      |      |             |             |
|             | SEMA7A             | -23895  | 25372   | -1.78       | 4E-05       |                                |      |      |             |             |
|             | CCR6               | -29650  | 26848   | -2.47       | 4E-05       |                                |      |      |             |             |
|             | ZC3H12D            | -13755  | 14627   | -1.77       | 4E-05       |                                |      |      |             |             |
|             | NAPSB              | -74057  | 66911   | -2.48       | 5E-05       |                                |      |      |             |             |
|             | CTLA4              | -13025  | 11011   | -2.90       | 5E-05       |                                |      |      |             |             |
|             | CR2                | -29721  | 34188   | -1.54       | 5E-05       |                                |      |      |             |             |
|             | CXCR6              | -67960  | 56639   | -3.00       | 6E-05       |                                |      |      |             |             |
|             | TNFRSF13C          | -3999   | 4804    | -1.43       | 6E-05       |                                |      |      |             |             |
|             | FCRLA              | -15398  | 20733   | -1.18       | 6E-05       |                                |      |      |             |             |
|             | IL21R              | -18561  | 15649   | -2.91       | 6E-05       |                                |      |      |             |             |
|             | SNHG17             | -25373  | 32515   | -1.28       | 7E-05       |                                |      |      |             |             |
|             | PTPRCAP            | -70464  | 68604   | -2.11       | 7E-05       |                                |      |      |             |             |
|             | GPR55              | -4601   | 4439    | -2.15       | 7E-05       |                                |      |      |             |             |
|             | CXCR5              | -12565  | 14297   | -1.57       | 8E-05       |                                |      |      |             |             |
|             | LTB                | -55931  | 50686   | -2.46       | 8E-05       |                                |      |      |             |             |

## Supplementary Figure E1

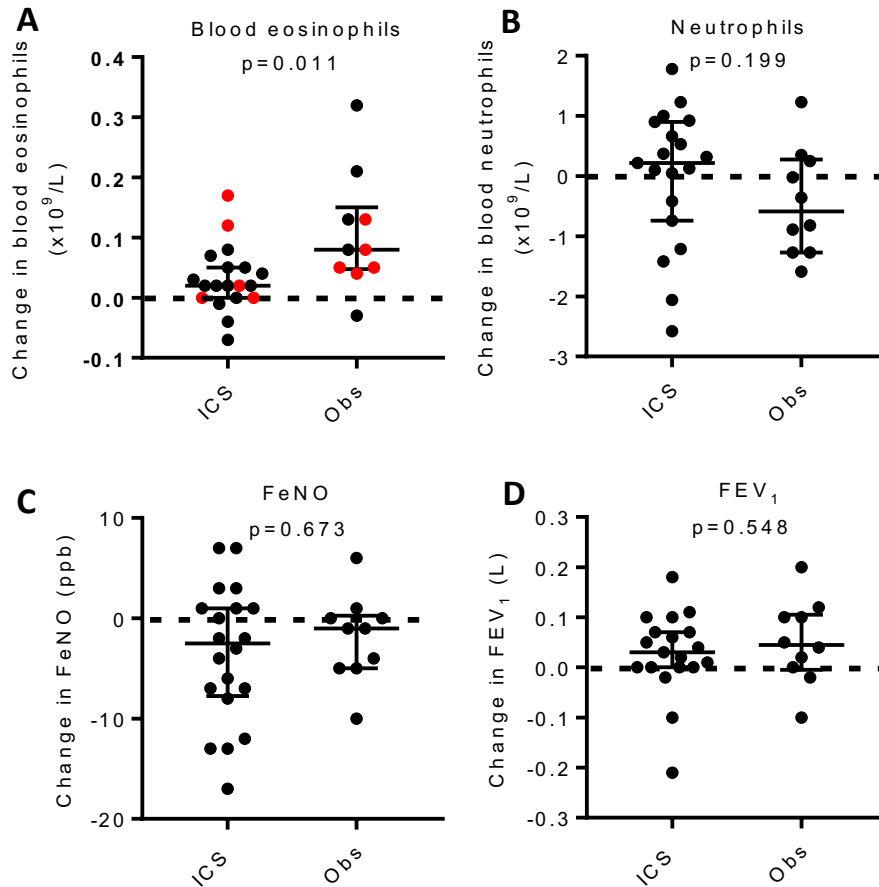

### Supplementary Figure E1

The change in peripheral blood biomarkers and airway physiology on participants with available paired data before and after 4 weeks' treatment with inhaled fluticasone or without treatment. Changes in numbers of **A)** eosinophils, with atopic participants shown in red, or **B)** neutrophils in peripheral blood. Changes in **C)** fractional exhaled nitric oxide (FeNO) or **D)** forced expiratory volume in 1 second (FEV<sub>1</sub>). Horizontal bars represent median (IQR), analysed by Mann Whitney U test. Obs represents the observation group.

# Supplementary Figure E2

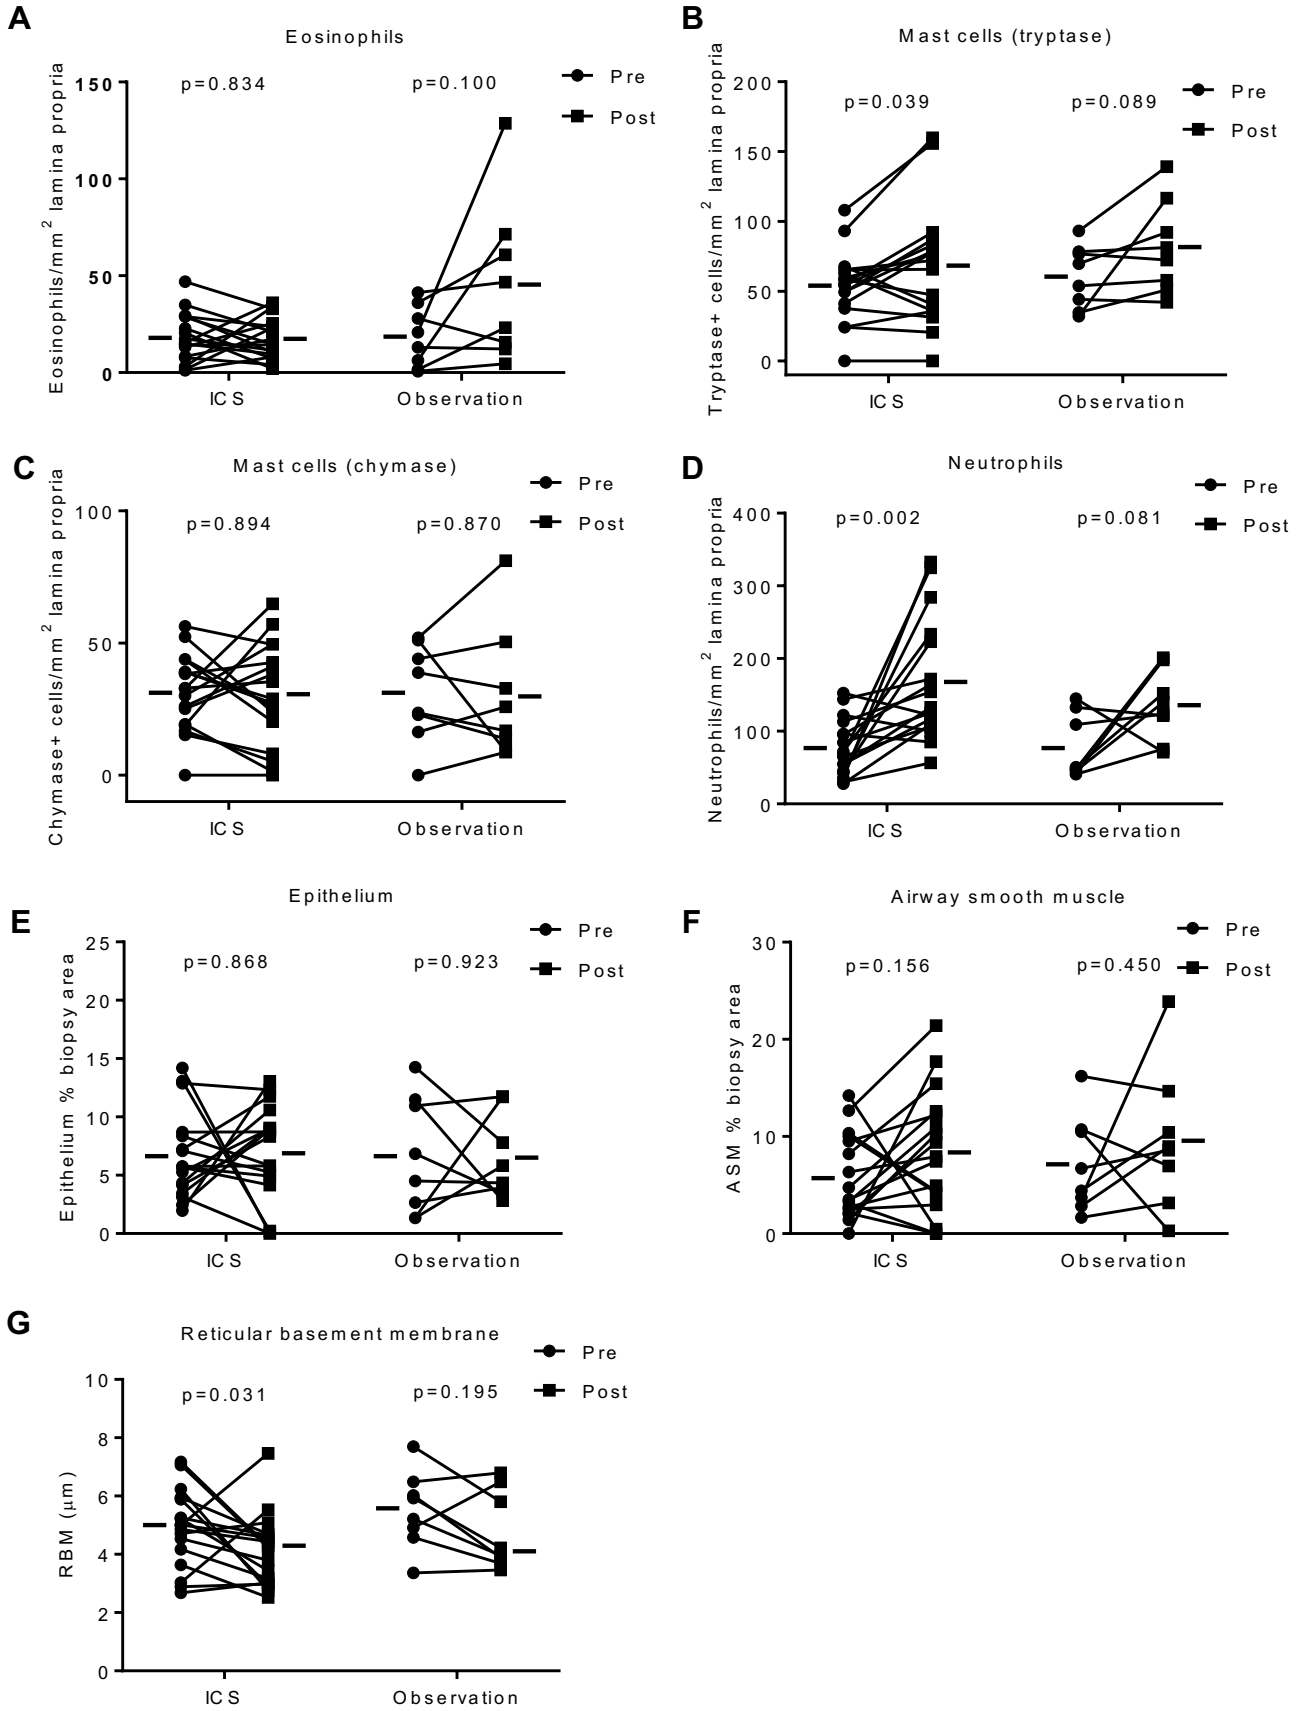

### **Supplementary Figure E2 (above)**

Immunohistochemical analysis of the lamina propria showing cell counts and remodelling features from participants with available paired data before and after 4 weeks treatment with inhaled fluticasone or without treatment. Figure shows before and after data for numbers of **A)** eosinophils, with atopic participants shown in red, **B)** tryptase-positive mast cells, **C)** chymase-positive mast cells, or **D)** neutrophils, expressed in absolute counts/mm<sup>2</sup>. Areas of **E)** epithelium or **F)** airway smooth muscle (ASM), expressed as a percentage of biopsy area. **G)** Measurements of reticular basement membrane (RBM) thickness. Horizontal bars represent mean (SD)(eosinophils, mast cells, neutrophils, ASM, epithelium) or median (IQR) (RBM), analysed by paired t test or Wilcoxon ranked pairs tests respectively.

# Supplementary Figure E3

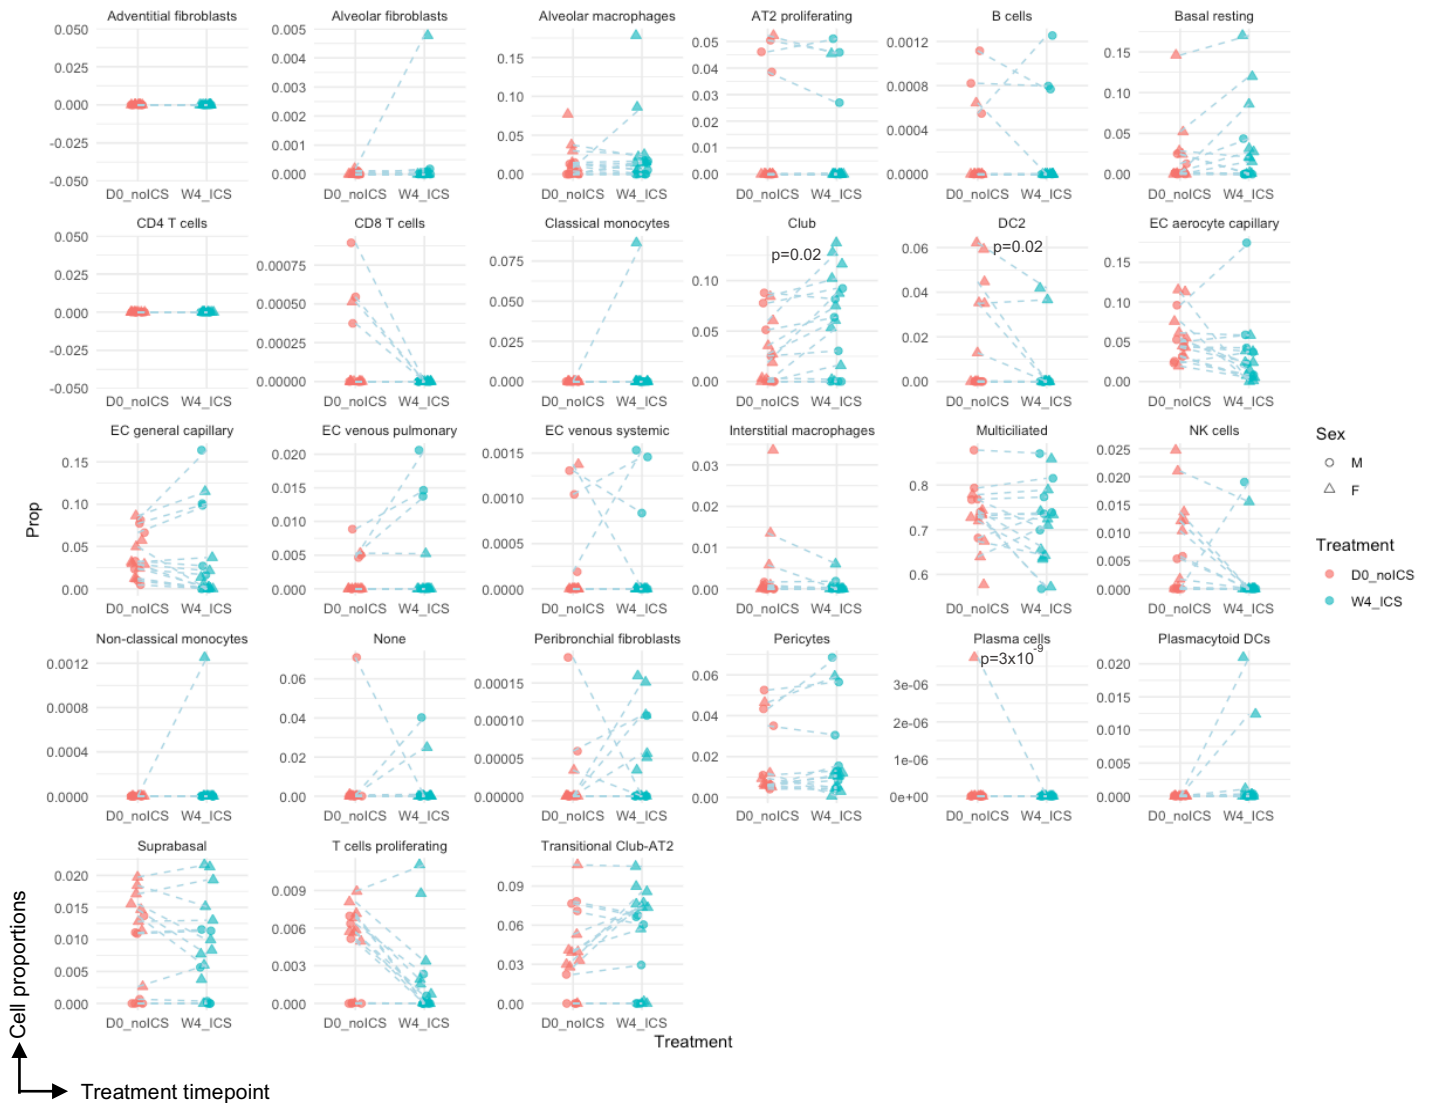

## Supplementary Figure E3 (Brushes)

Cell deconvolution analysis of bronchial brushing transcriptomic data. Analysis performed using MuSiC and reference cell signatures from single cell data from the Lung Cell Atlas (E5) and annotated with Azimuth in. FDR P values, shown where  $P < 0.05$ , represent paired non-parametric ranked tests from a linear regression analysis between week 4 and week 0.

# Supplementary Figure E4

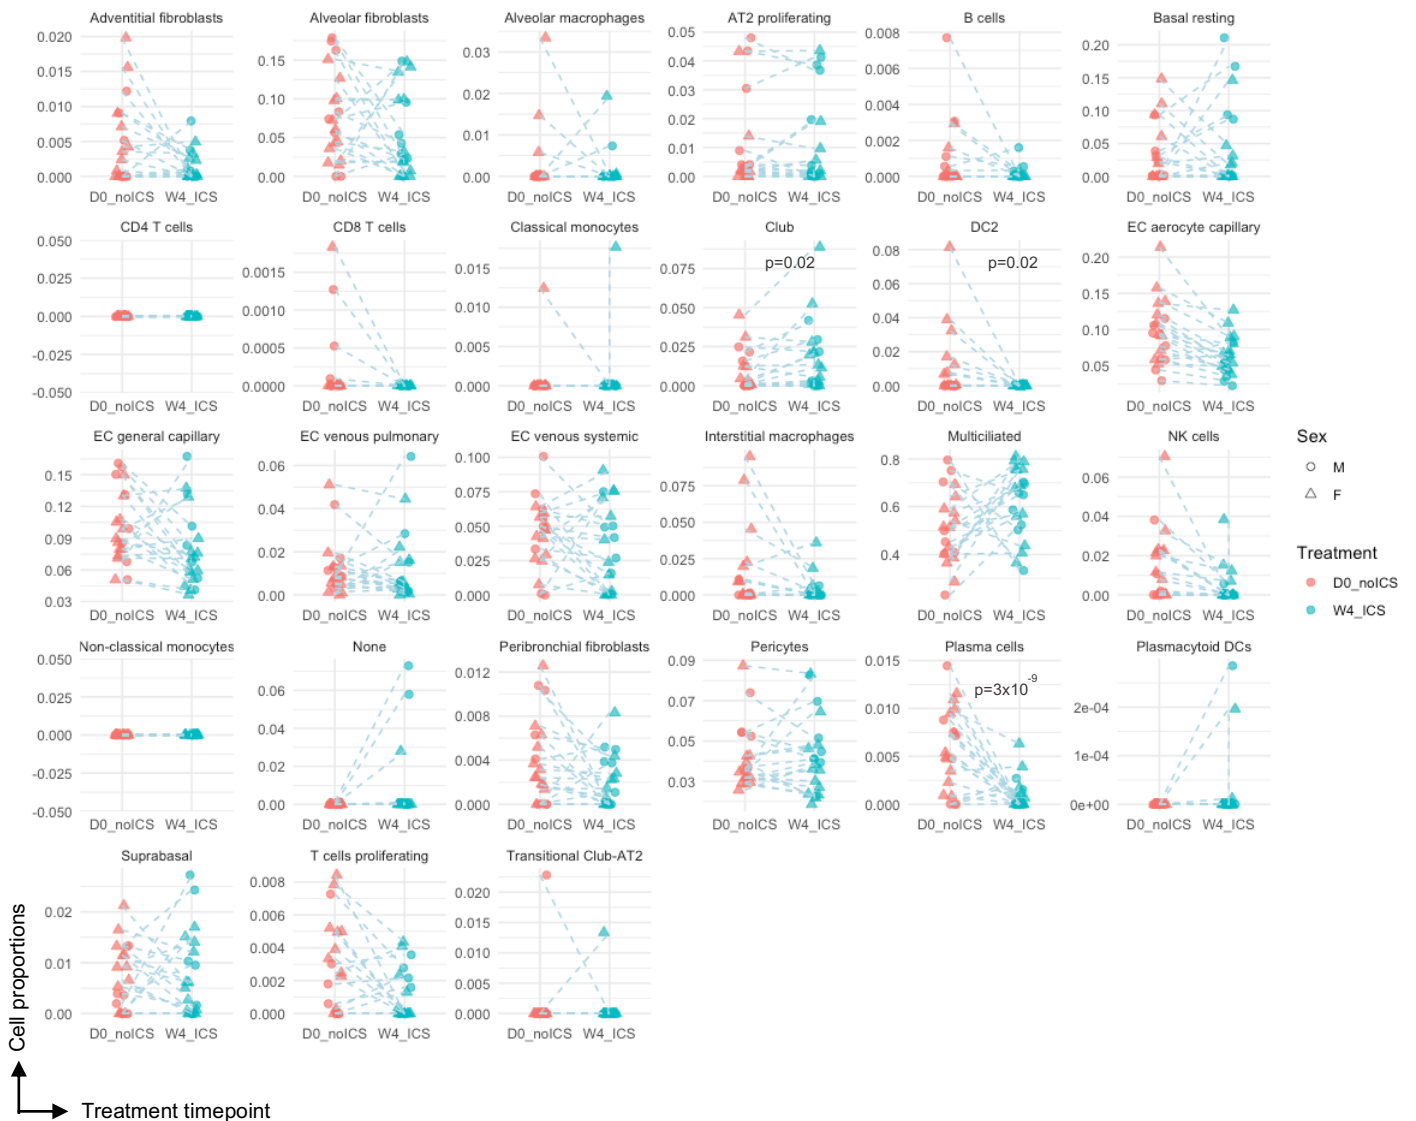

## Supplementary Figure E4 (Biopsies)

Cell deconvolution analysis of bronchial biopsy transcriptomic data. Analysis performed using MuSiC and reference cell signatures from single cell data from the Lung Cell Atlas (E5) and annotated with Azimuth in. FDR P values, shown where  $P < 0.05$ , represent paired non-parametric ranked tests from a linear regression analysis between week 4 and week 0.

## Supplementary Figure E5

**A**

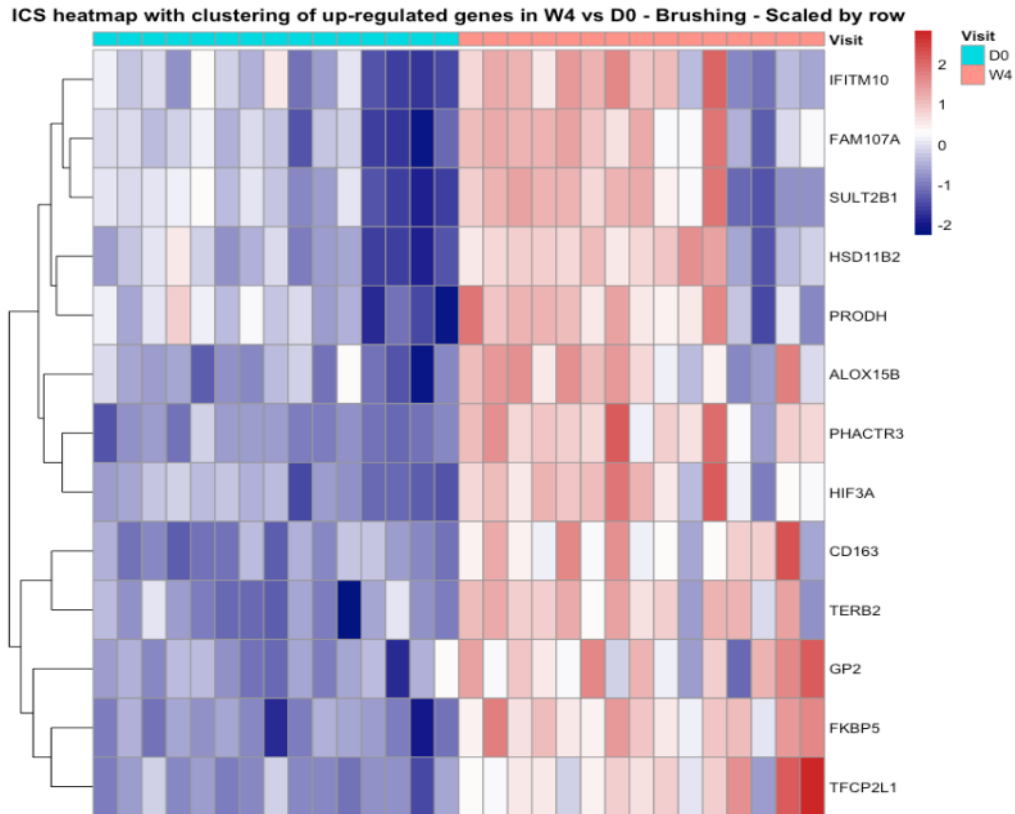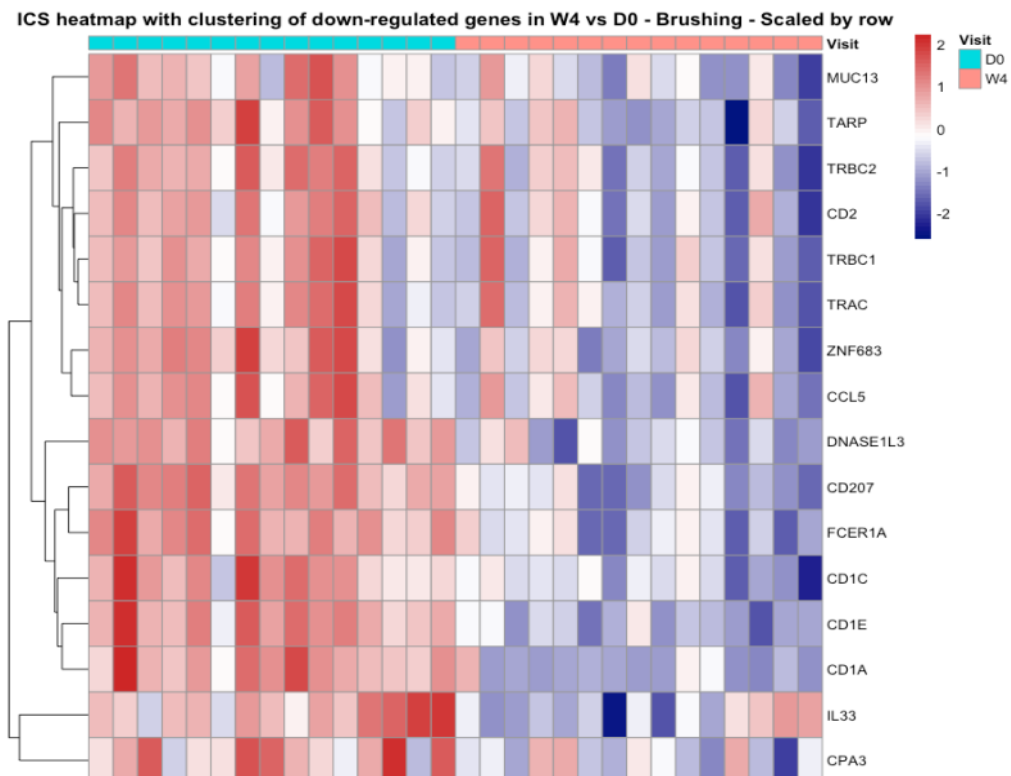

**Supplementary Figure E5.** Changes in gene expression measured by RNAseq in response to 4 weeks treatment with inhaled fluticasone. **A)** Bronchial brush heatmap representing the most differentially expressed genes (adjusted  $P < 0.001$ ,  $\log_2$  fold change  $> 0.5$ ). **B)** Bronchial biopsy heatmap representing the most differentially expressed genes (adjusted  $P < 0.001$ ,  $\log_2$  fold change  $> 0.5$ ).

## Supplementary Figure E5 (continued)

**B**

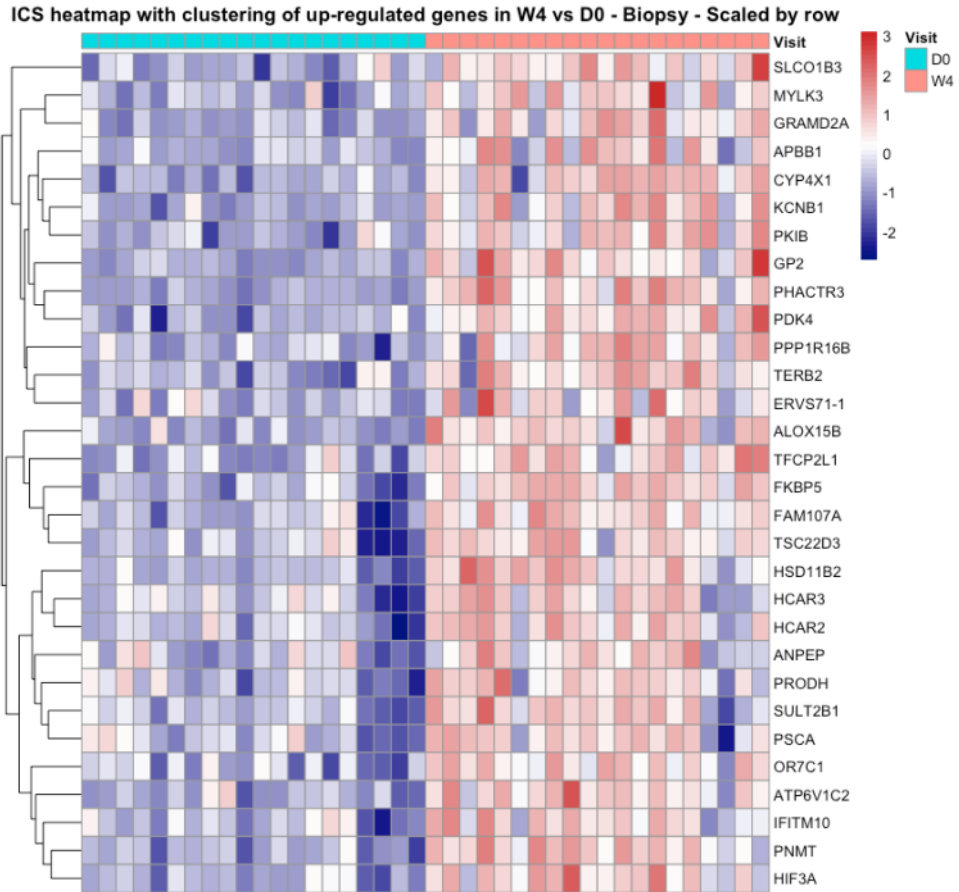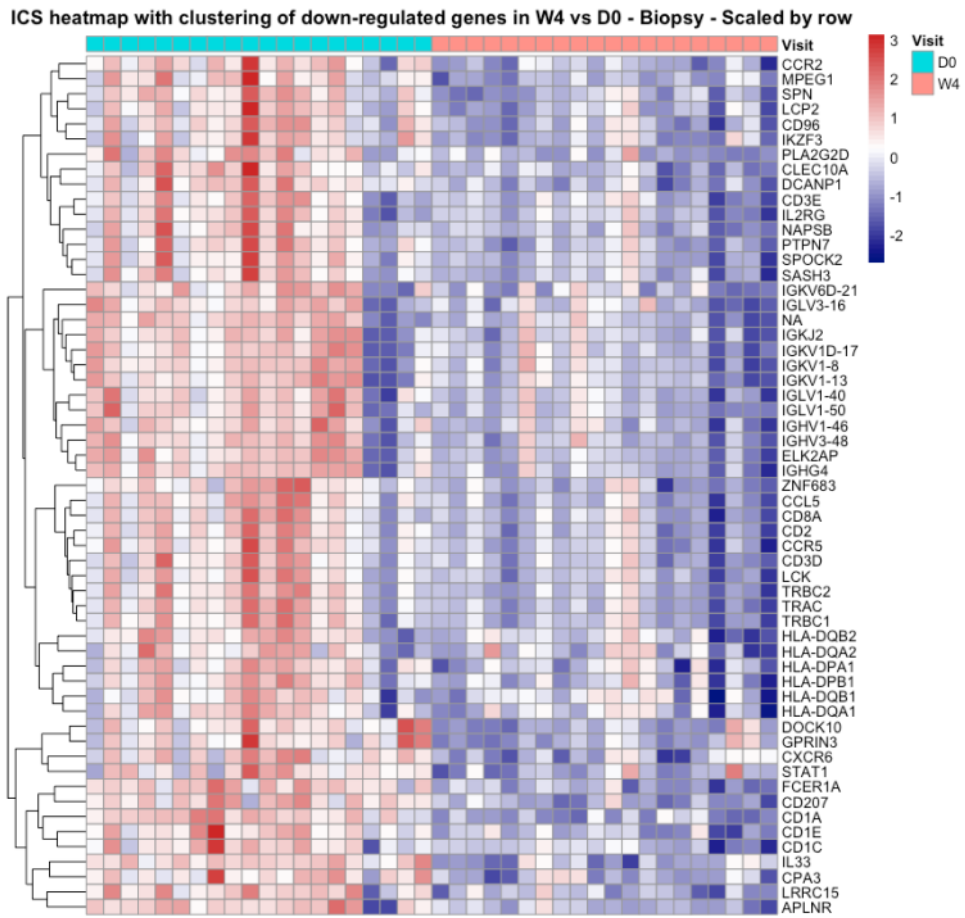



## Supplementary Figure E6

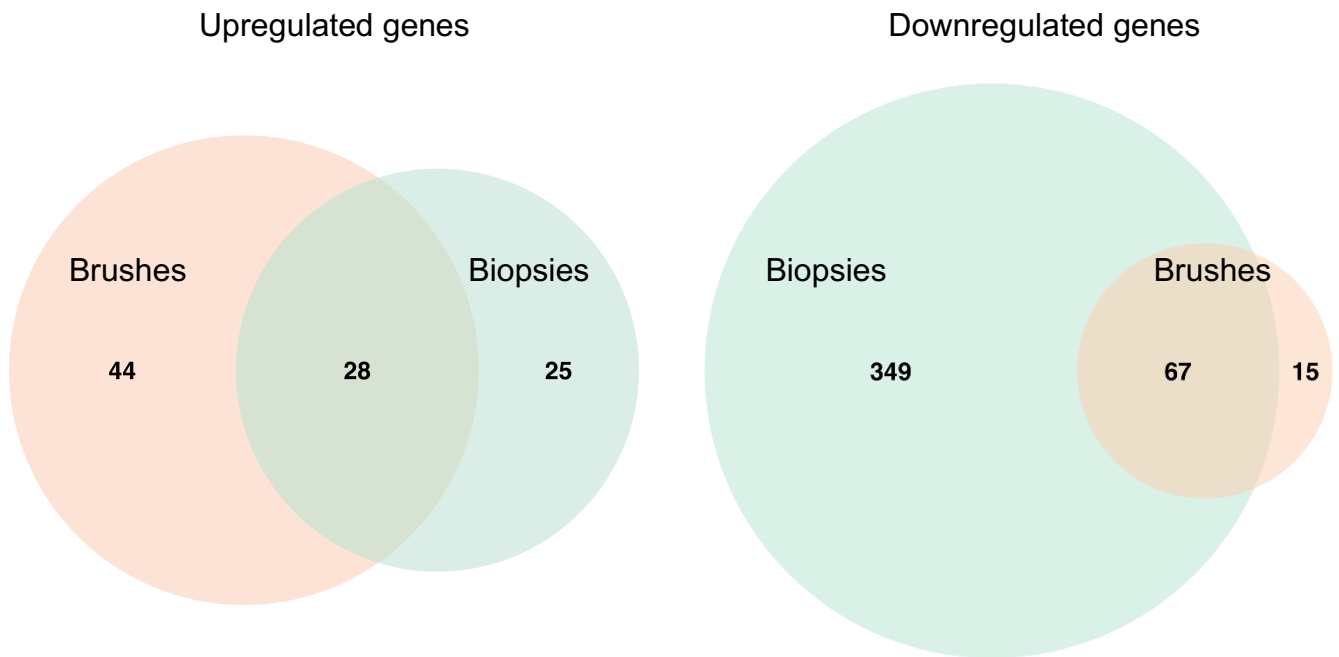

### Supplementary Figure E6

Venn diagram of numbers of differentially expressed genes at week 4 versus baseline amongst those receiving inhaled fluticasone, showing genes **A)** upregulated and **B)** downregulated. Numbers generated with *DeSeq2*, with a significance threshold of  $\log_2$  fold change  $> 1$  and adjusted  $p < 0.05$ .

## Supplementary Figure E7

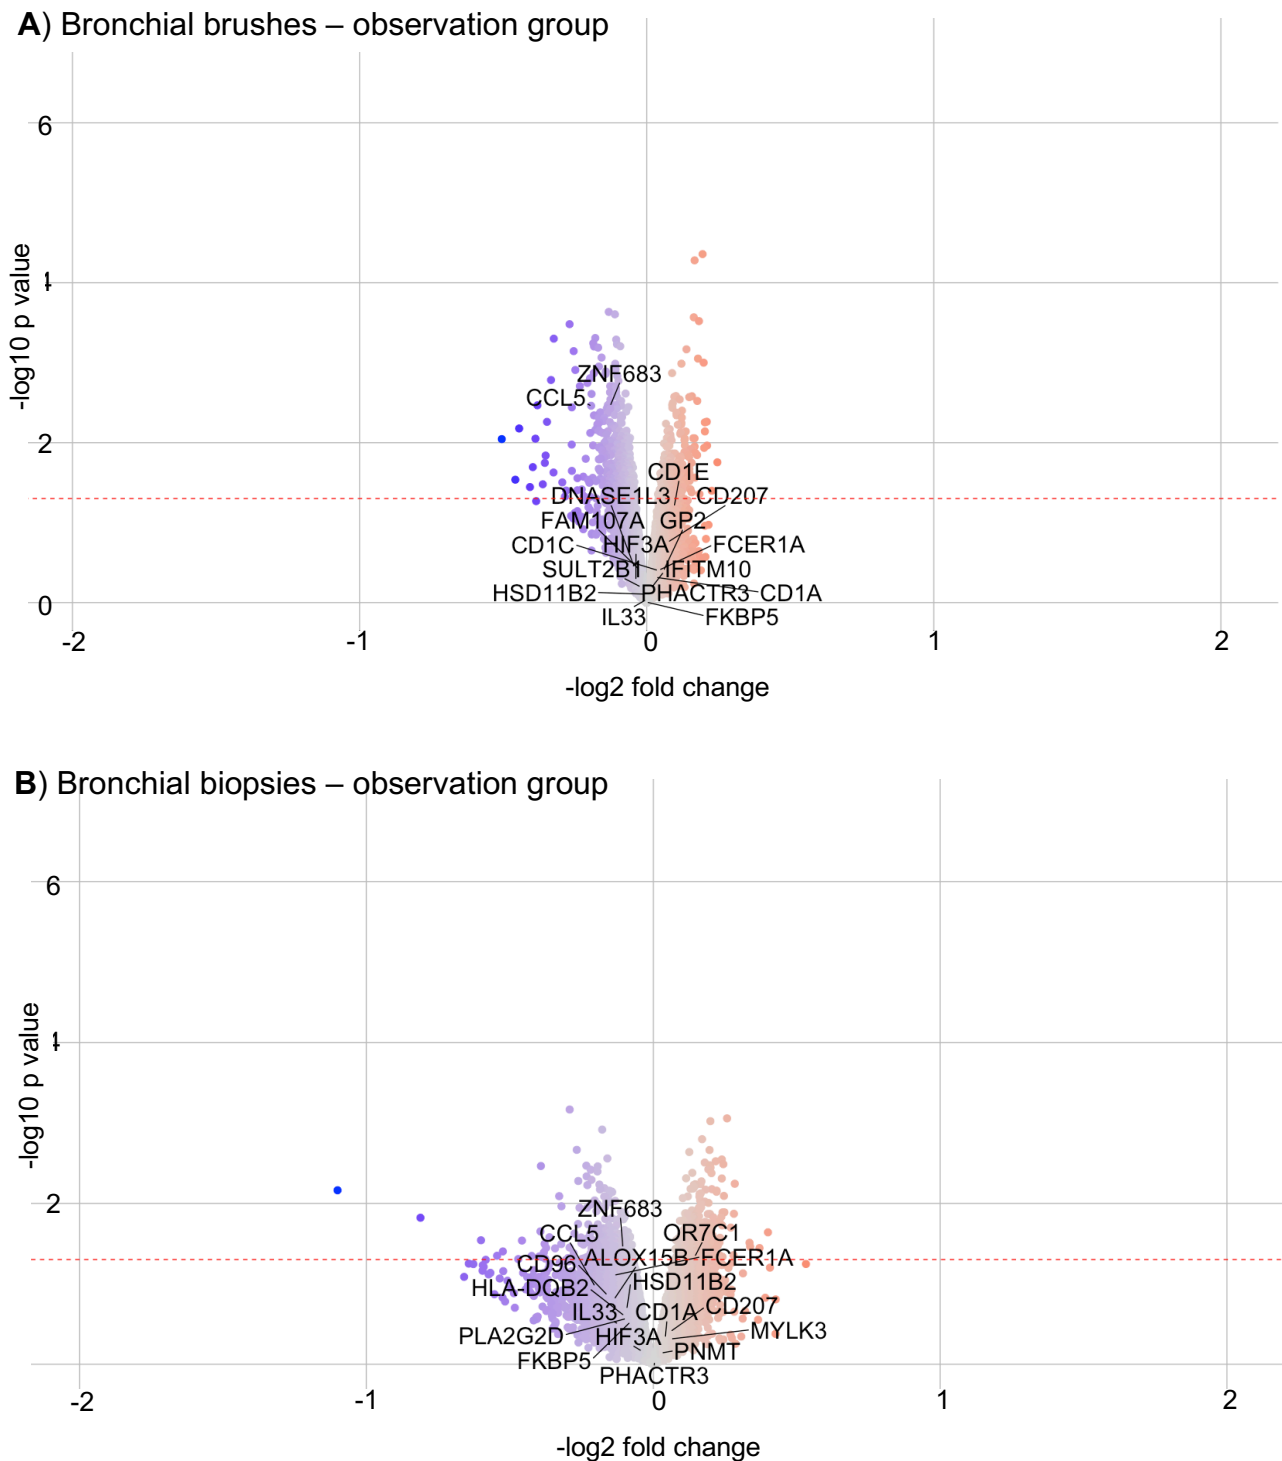

### Supplementary Figure E7

Changes in gene expression measured by RNAseq following 4 weeks observation (control group). **A)** Bronchial brush volcano plot. **B)** Bronchial biopsy volcano plot. The labelled genes are a subset of those that were significantly changed by ICS. p values have not been adjusted.

## Supplementary Figure E8

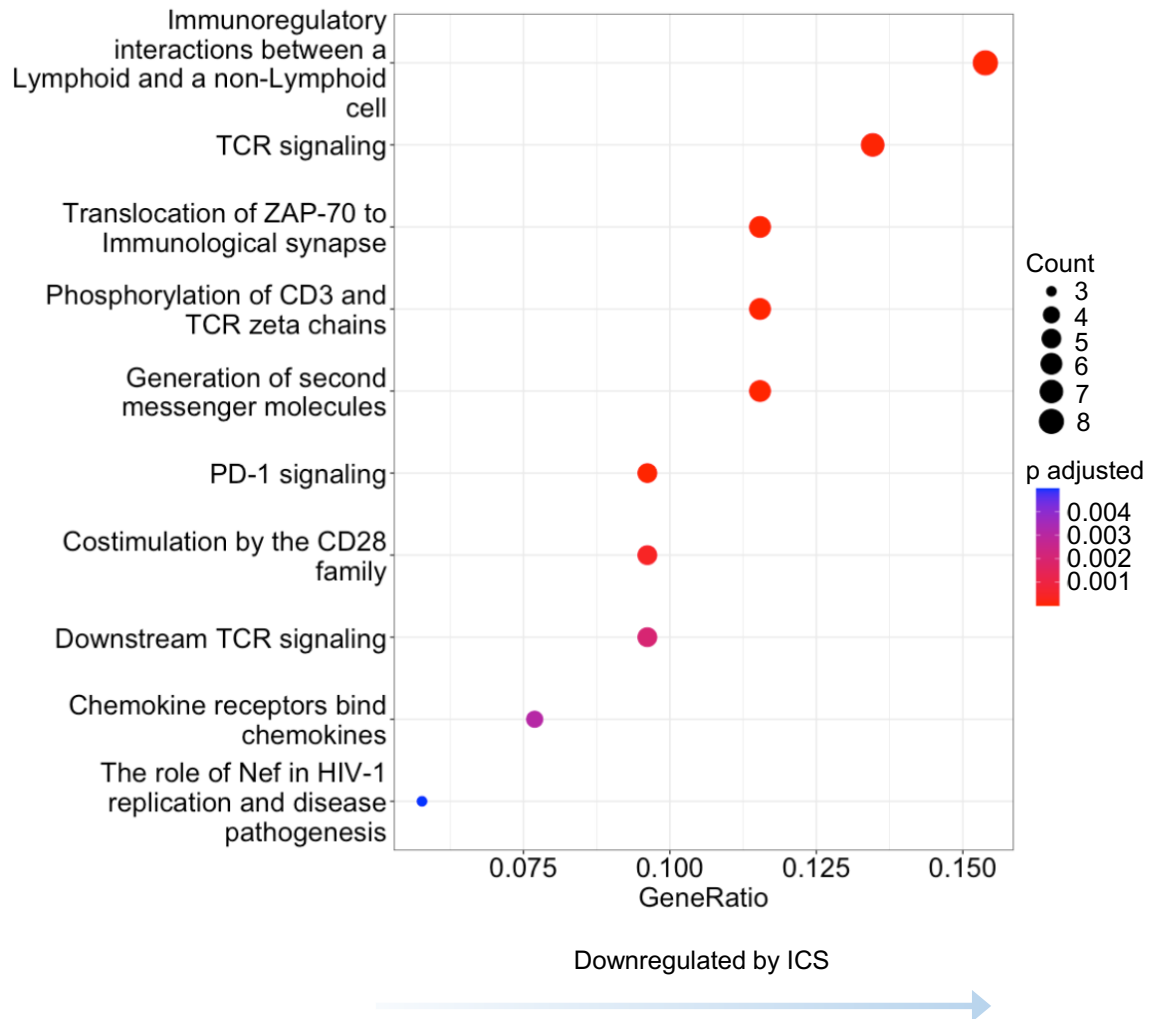

### Supplementary Figure E8. Reactome pathway analysis of bronchial brushings

Reactome pathways significantly differentially enriched in bronchial brushing downregulated genes ( $\log_2$  fold change  $>0$ , adjusted P value  $<0.25$ ) after 4 weeks of inhaled fluticasone (treatment group only). x axis represents the gene ratio, the percentage of total differentially expressed genes in the given pathway; node size is proportional to number of genes differentially expressed in the pathway; node colour is proportional to Benjamini-Hochberg adjusted p value.

## Supplementary Figure E9

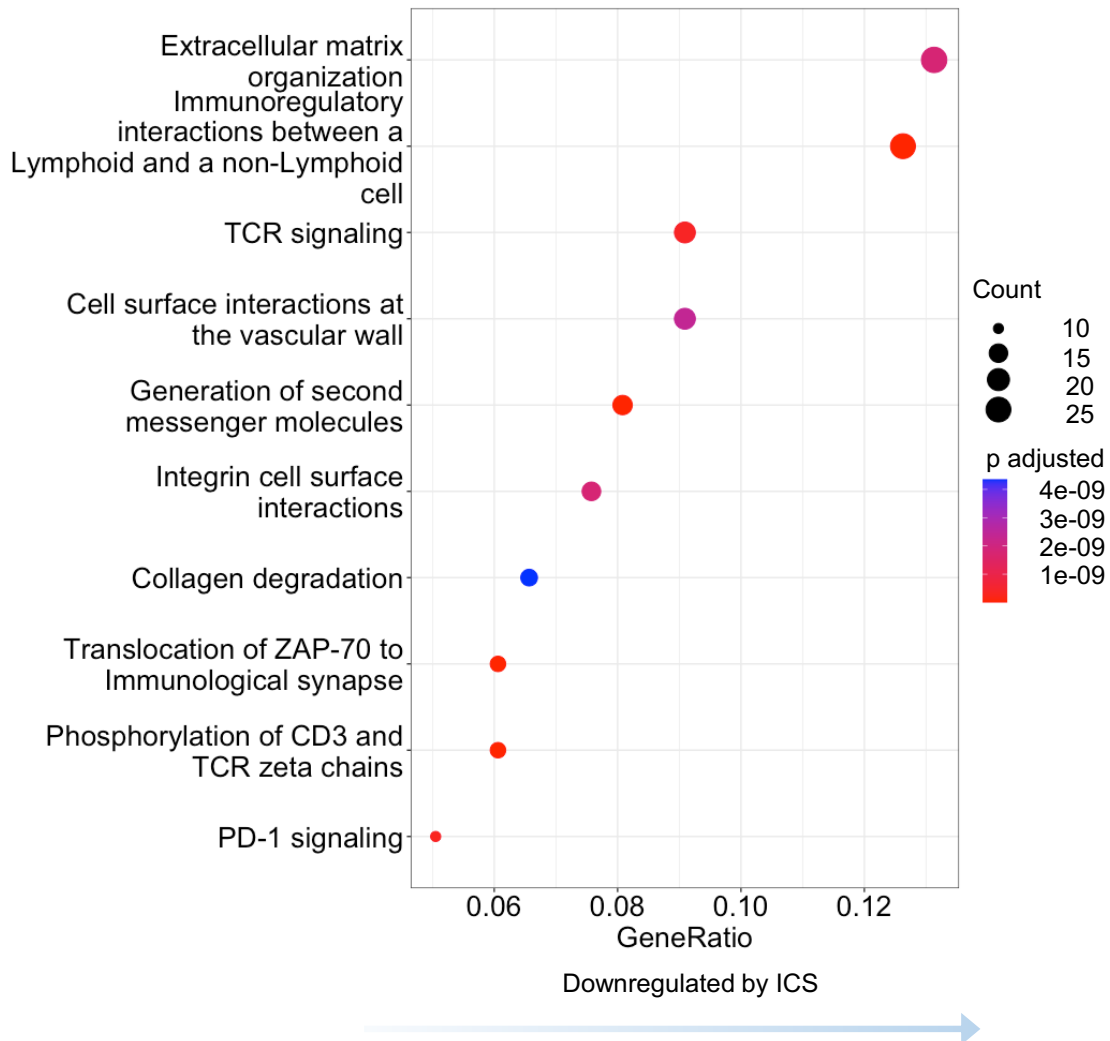

### Supplementary Figure E9 Reactome pathway analysis of bronchial biopsies

Reactome pathways significantly differentially enriched in bronchial biopsy downregulated genes ( $\log_2$  fold change  $>0$ , adjusted P value  $<0.25$ ) after 4 weeks of inhaled fluticasone (treatment group only). x axis represents the gene ratio, the percentage of total differentially expressed genes in the given pathway; node size is proportional to number of genes differentially expressed in the pathway; node colour is proportional to Benjamini-Hochberg adjusted p value.

## Supplementary Figure E10

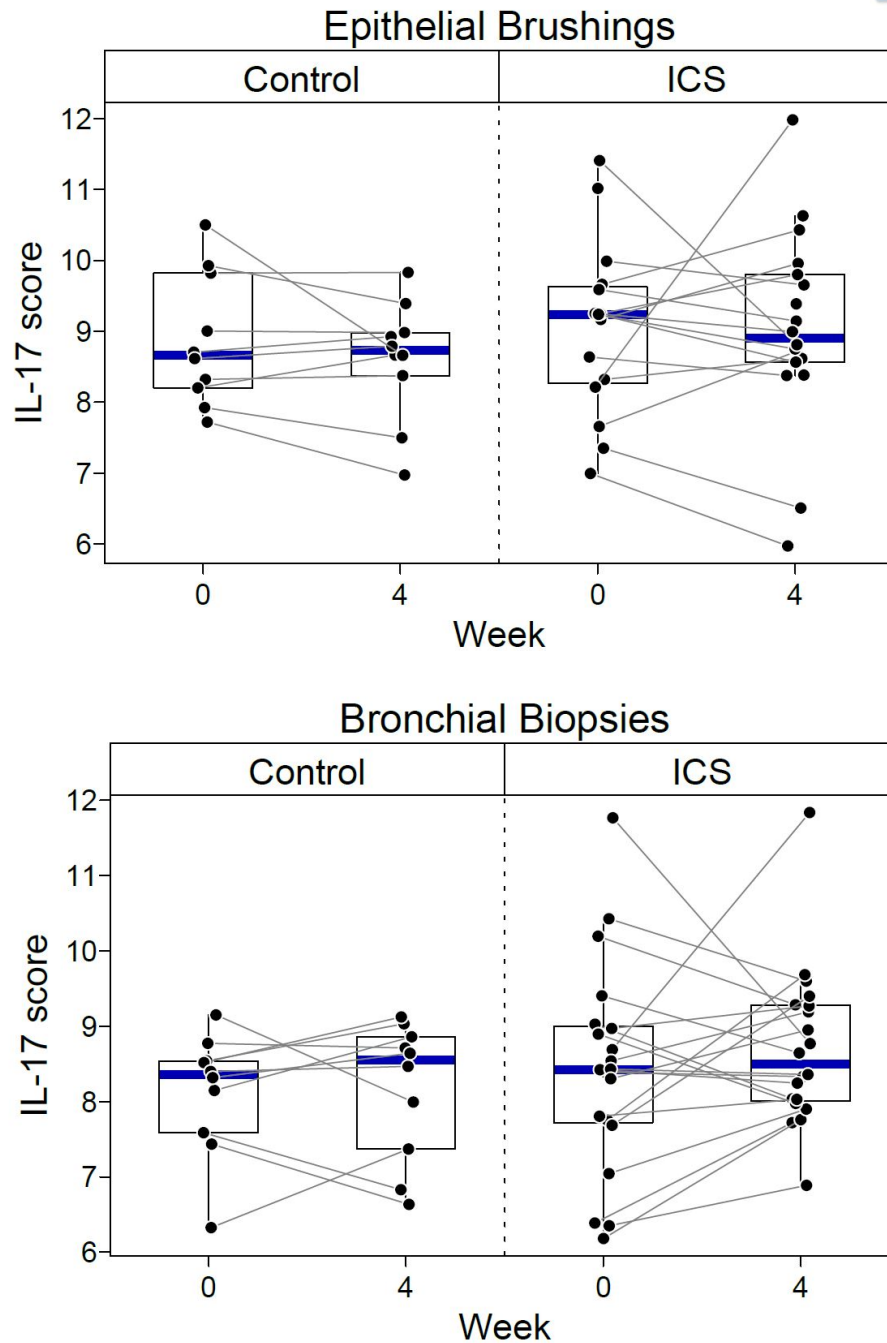

**Supplementary Figure E10.**

Expression of an IL-17-dependent gene signature in bronchial brushes and biopsies in response to 4 weeks treatment with inhaled fluticasone, or observation (control).

## Supplementary Figure E11

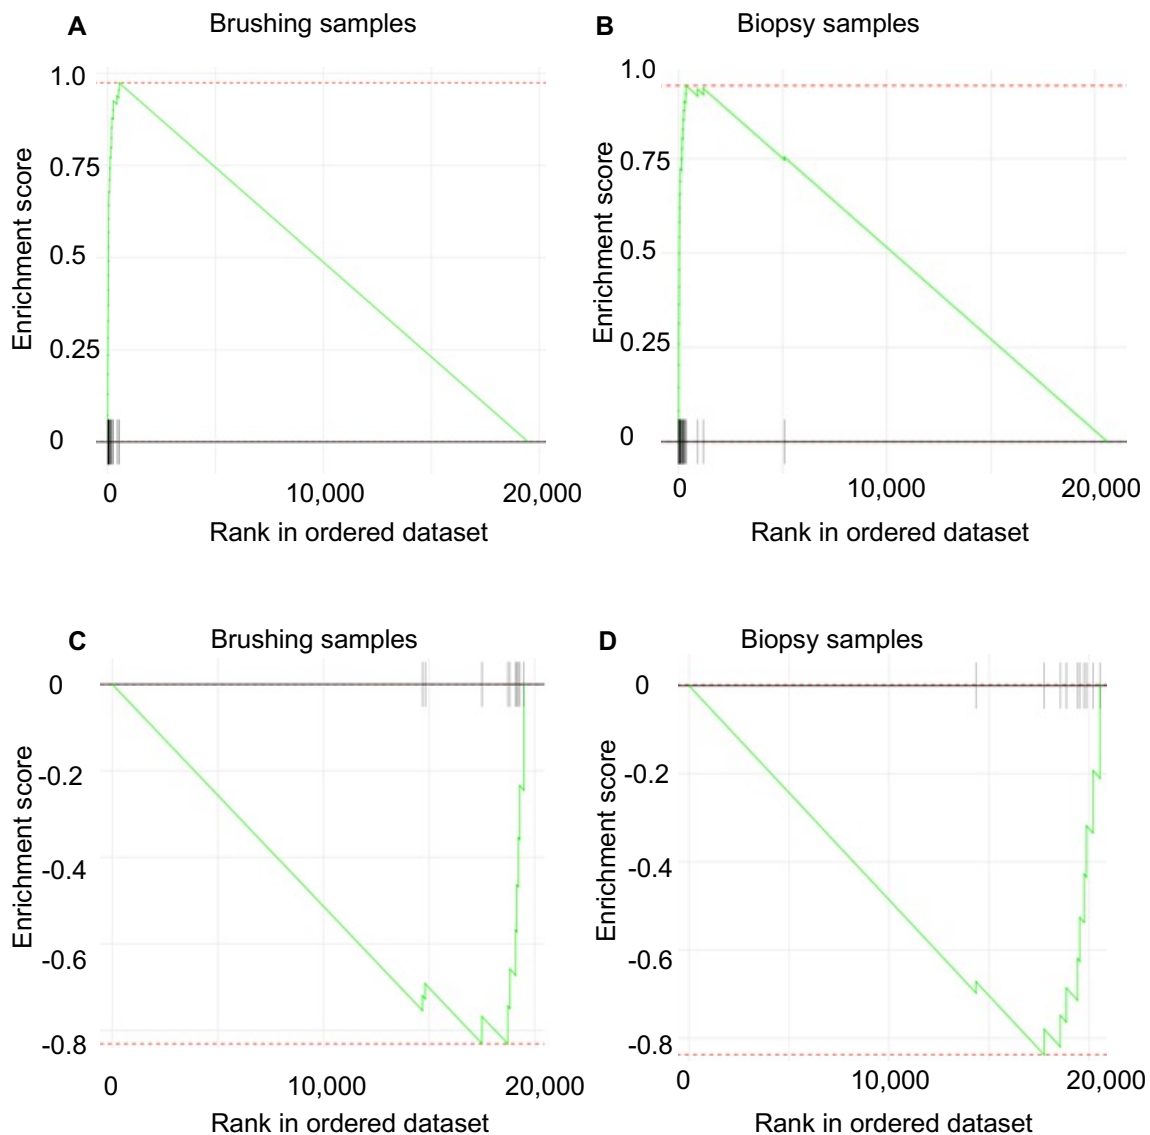

### Supplementary Figure E11

Geneset enrichment analysis profiles amongst fluticasone treatment-related differentially expressed genes in healthy controls, showing very strong enrichment for a set of 26 genes shown to be induced (A, B) in participants with asthma by 10 weeks of inhaled fluticasone 500 mcg BD in a microarray analysis of epithelial brushings by Woodruff *et al* (E26). B,D) Enrichment of genes known to be down-regulated in Woodruff *et al* (E26). NES, normalised enrichment score. Adjusted  $P < 0.0001$ .

## Supplementary Figure E12

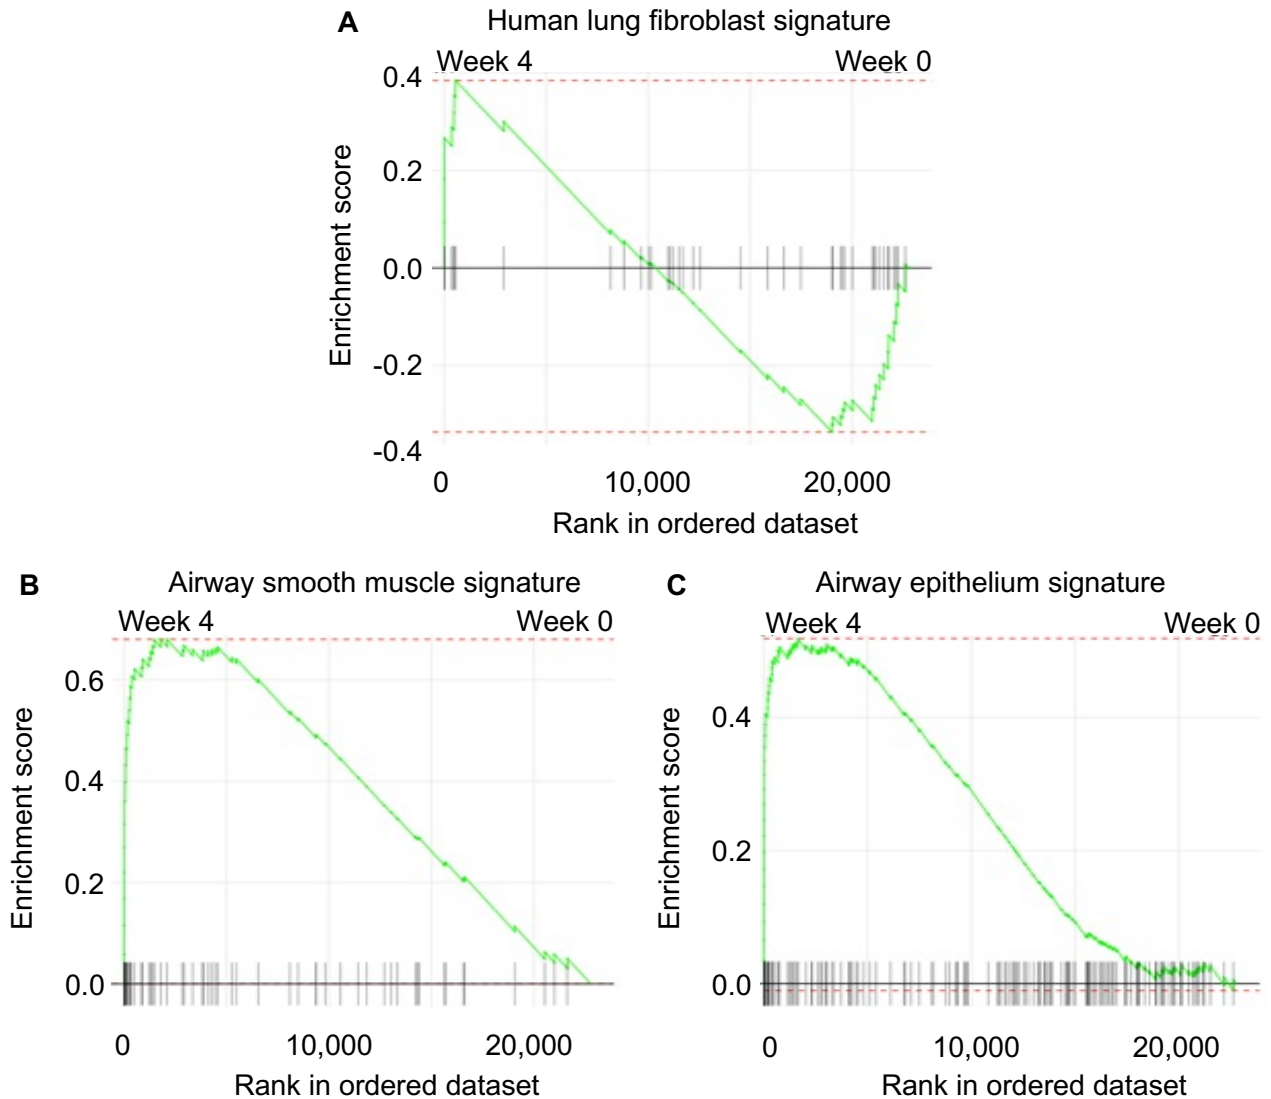

### Supplementary Figure E12

Geneset enrichment analysis (GSEA) assessing enrichment profiles for genesets derived from structural cells, amongst fluticasone treatment-related differentially expressed genes in healthy controls. **A)** Genes induced with log fold change  $>3$ , adjusted  $P < 0.05$  in IMR-90 human lung fibroblasts treated with cortisol (E23). No enrichment observed,  $P > 0.05$ . **B)** Genes induced with log fold change  $>3$ , adjusted  $P < 0.05$  in primary human airway smooth muscle cells treated with fluticasone propionate (E24). Geneset highly enriched, normalised enrichment score (NES) 2.7, adjusted  $P < 1 \times 10^{-11}$ . **C)** Genes induced with log fold change  $>1$ , adjusted  $P < 0.05$  in primary human bronchial epithelial cells treated with budesonide (E25). Geneset highly enriched, NES 2.5, adjusted  $P < 1 \times 10^{-11}$ .

## Supplementary Figure E13

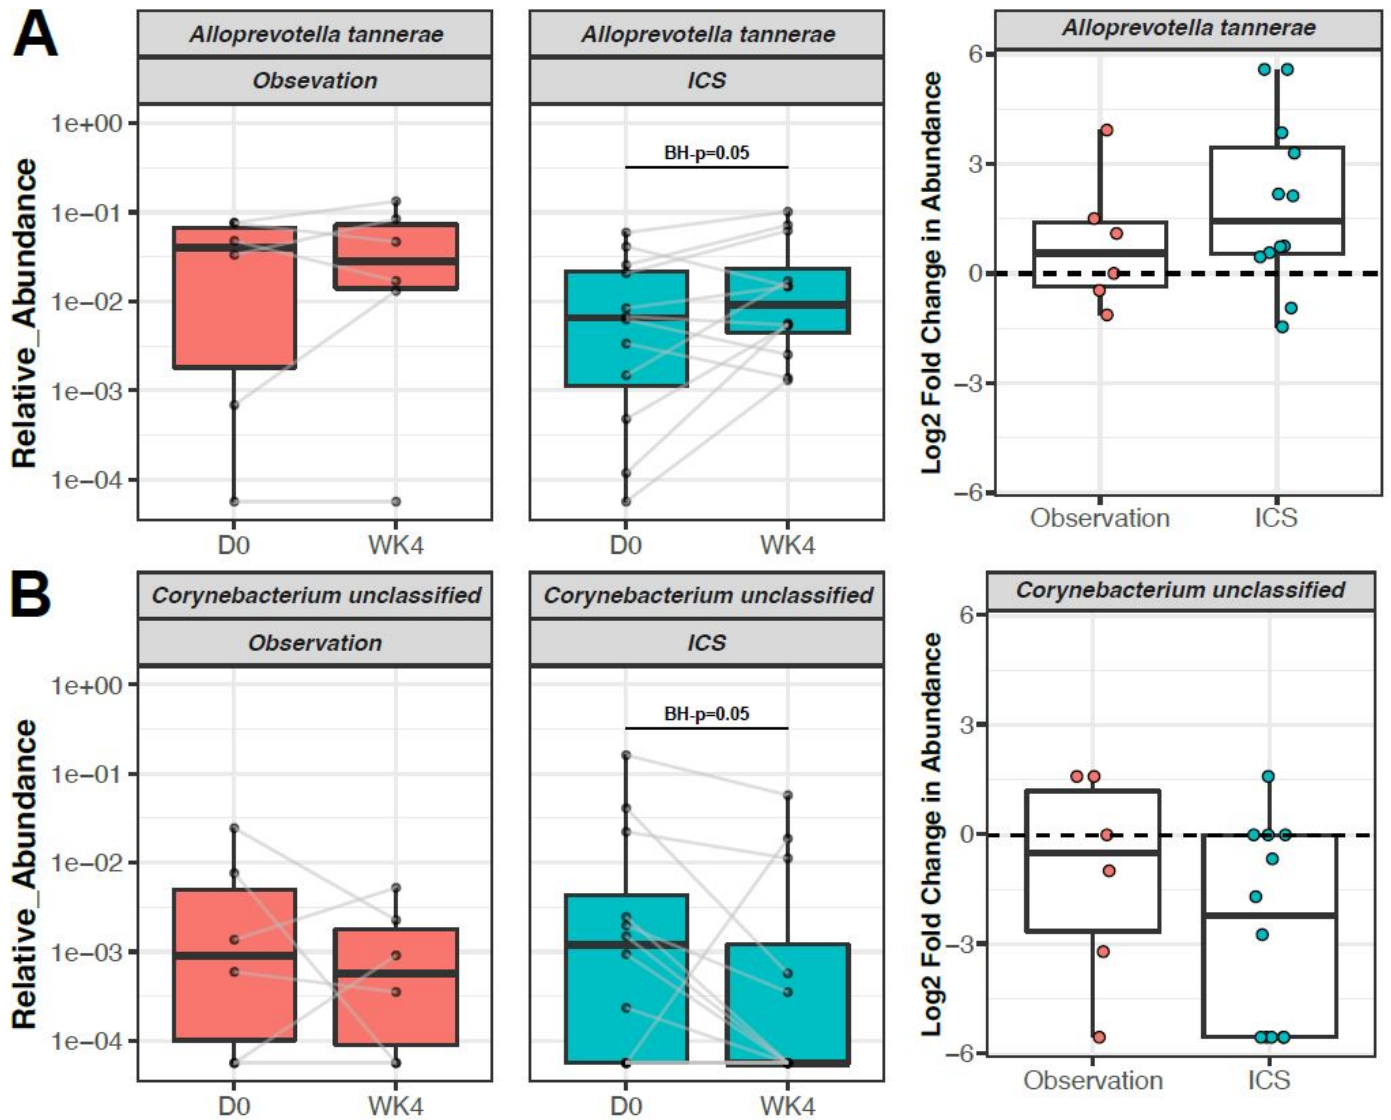

### Supplementary Figure E13

Changes in **A**) *Alloprevotella tannerae* and **B**) *Corynebacterium unclassified* after 4 weeks of ICS-treatment or observation, which were significant with Benjamini-Hochberg adjusted p-value  $< 0.05$ , expressed as log<sub>2</sub> fold change in relative abundance of taxa.



## Supplementary Figure E14

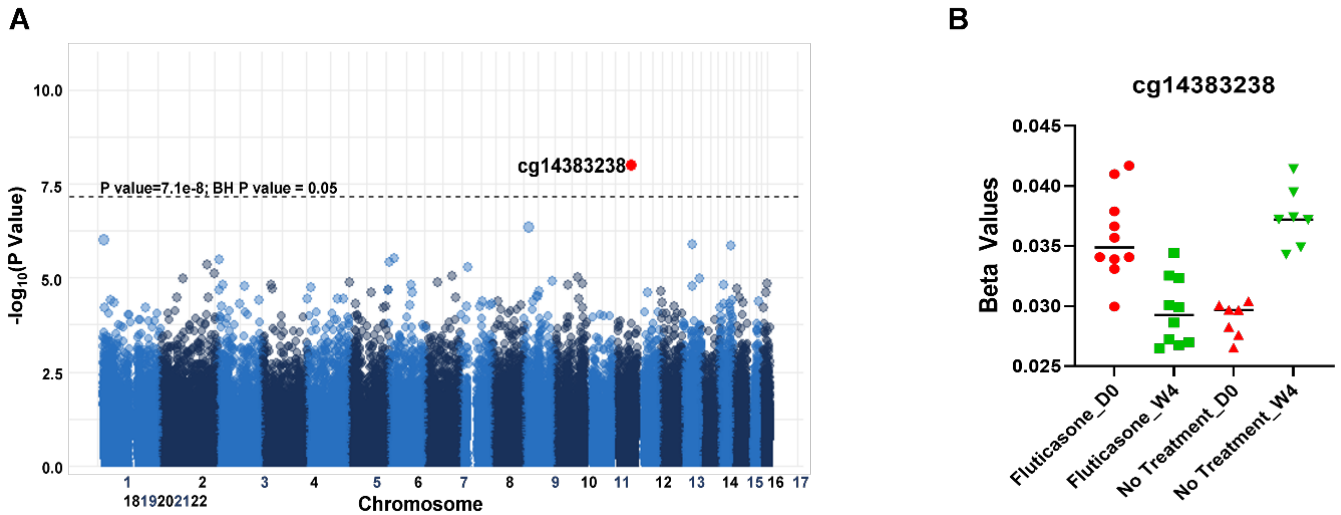

### Supplementary Figure E14

**A)** Manhattan plot depicting the results of the linear regression interaction model investigating the effect of fluticasone treatment for 4 weeks. Genomic location of CpG sites are represented on x-axis and  $-\log_{10}(p \text{ values})$  are represented on the y axis. The highlighted point (red) represents the only CpG site (cg14383238) that was significantly differentially methylated at week 4 compared to day 0 in response to fluticasone treatment. **B)** Contrasting trends observed in cg14383238 methylation between week four and day zero of fluticasone-treated and untreated groups. (D0- Day 0; W4- Week 4).
